# Supplementary material for: Polar-Functionalized Polyethylenes Enabled by Palladium-Catalyzed Copolymerization of Ethylene and Butadiene/Bio-Based Alcohol-Derived Monomers
Source: MDPI journal article supplement (doi:10.3390/polym15041044), 2023-02-19
Supplement: s1 [file s1]

## Supplementary Information

### **Polar Functionalized Polyethylenes Enabled by Palladium Catalyzed Copolymerization of Ethylene and Butadiene/Bio-Based Alcohol Derived Monomers**

Yanlin Zong,<sup>1,2</sup> Chaoqun Wang<sup>1,2</sup>, Yixin Zhang<sup>1,\*</sup> and Zhongbao Jian<sup>1,2,\*</sup>

<sup>1</sup> State Key Laboratory of Polymer Physics and Chemistry, Changchun Institute of Applied Chemistry, Chinese Academy of Sciences, Renmin Street 5625, Changchun 130022, China

<sup>2</sup> University of Science and Technology of China, Hefei 230026, China

#### **Contents**

|                                                                      |           |
|----------------------------------------------------------------------|-----------|
| <b>1. Characterization of Pd-3</b>                                   | <b>2</b>  |
| <b>2. Characterization of 2,7-octadienyl ether monomers</b>          | <b>3</b>  |
| <b>3. NMR figures of copolymers</b>                                  | <b>9</b>  |
| <b>4. GPC figures of copolymers</b>                                  | <b>16</b> |
| <b>5. DSC figures of copolymers</b>                                  | <b>20</b> |
| <b>6. Steric maps of Pd-1, Pd-2 and Pd-3</b>                         | <b>24</b> |
| <b>7. Possible reaction pathways in the copolymerization process</b> | <b>24</b> |

## 1. Characterization of Pd-3

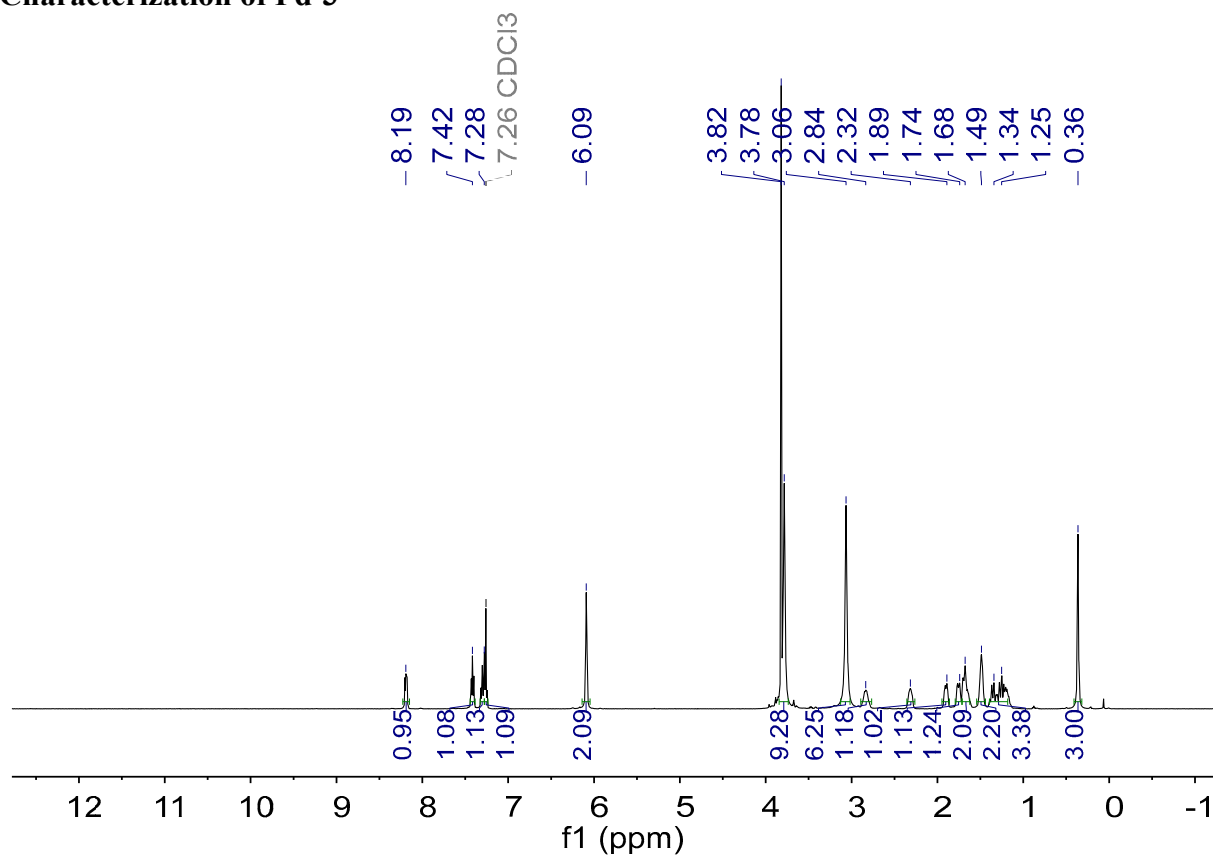

**Figure S1.**  $^1\text{H}$  NMR spectrum of **Pd-3** in  $\text{CDCl}_3$ .

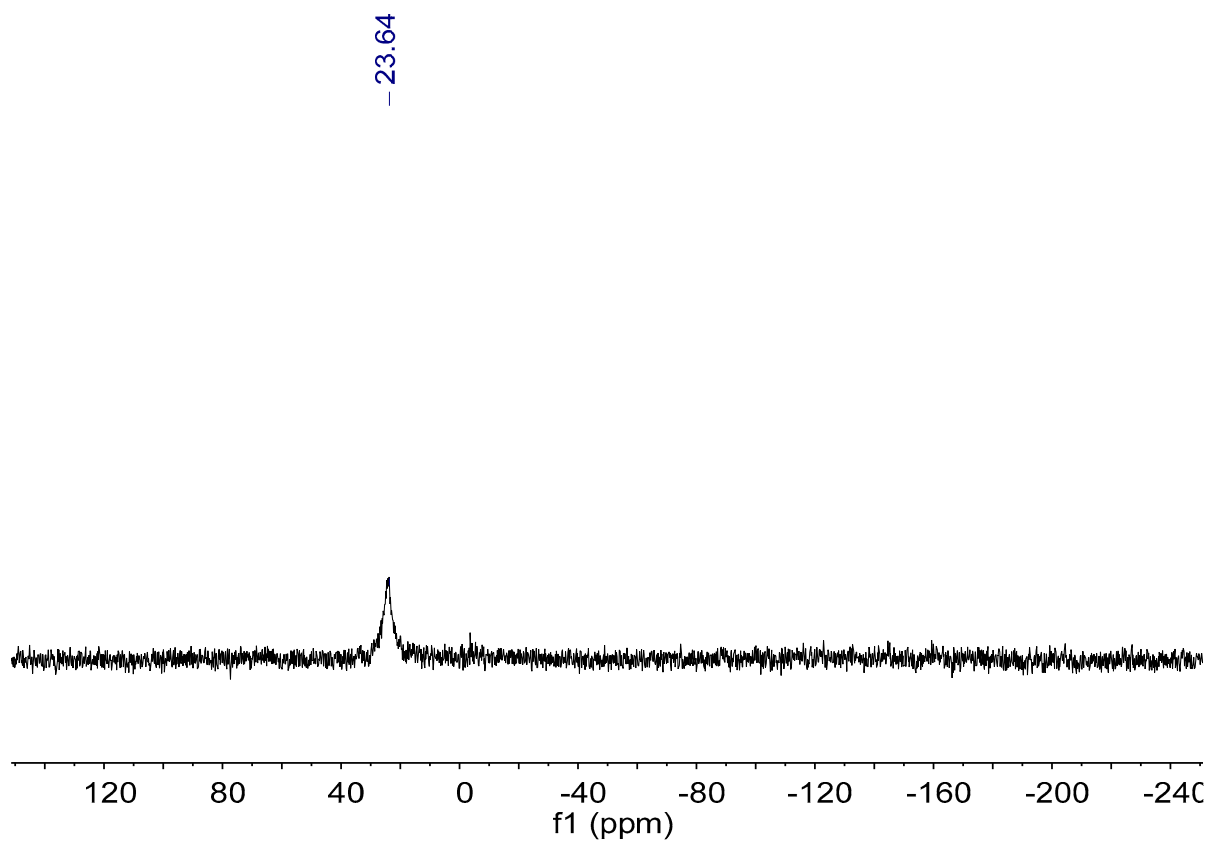

**Figure S2.**  $^{31}\text{P}$  NMR spectrum of **Pd-3** in  $\text{CDCl}_3$ .

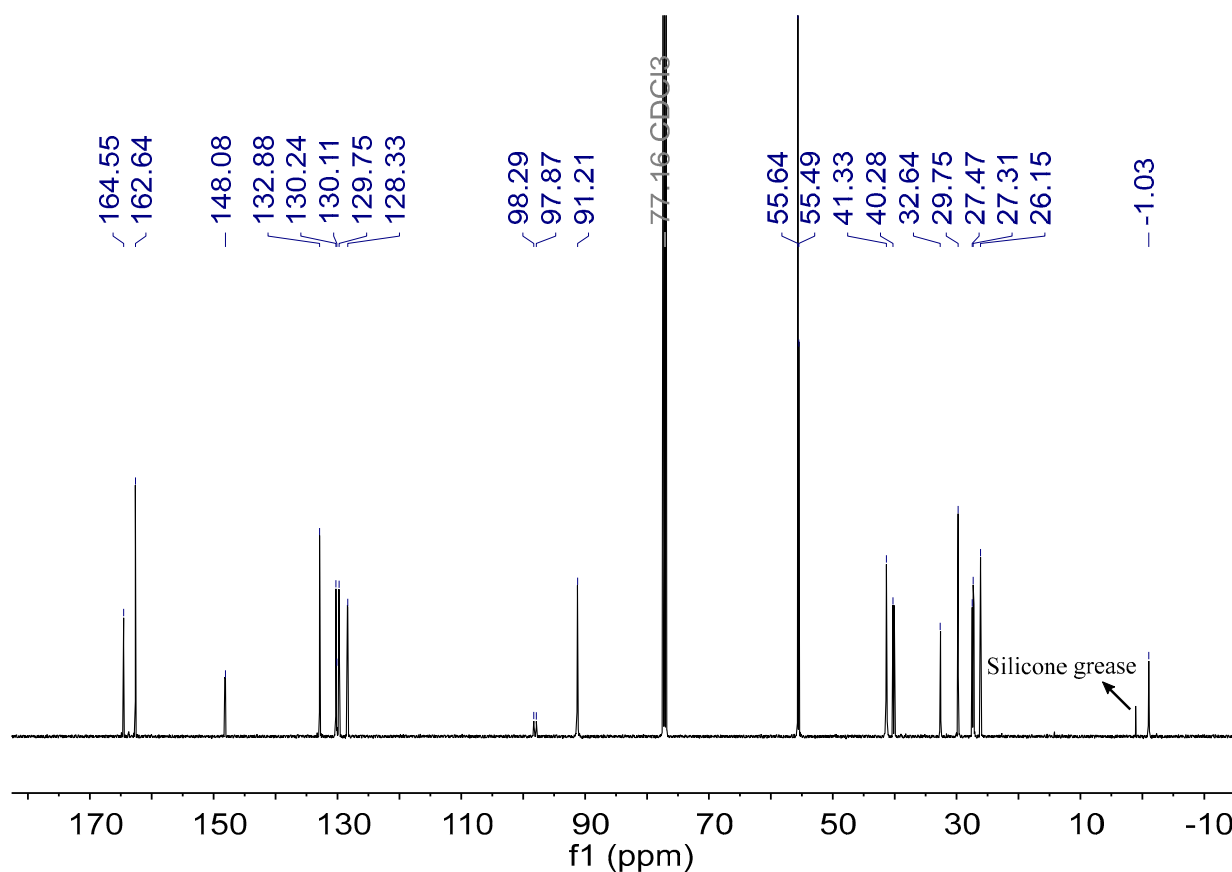

**Figure S3.** <sup>13</sup>C NMR spectrum of **Pd-3** in CDCl<sub>3</sub>.

## 2. Characterization of 2,7-octadienyl ether monomers

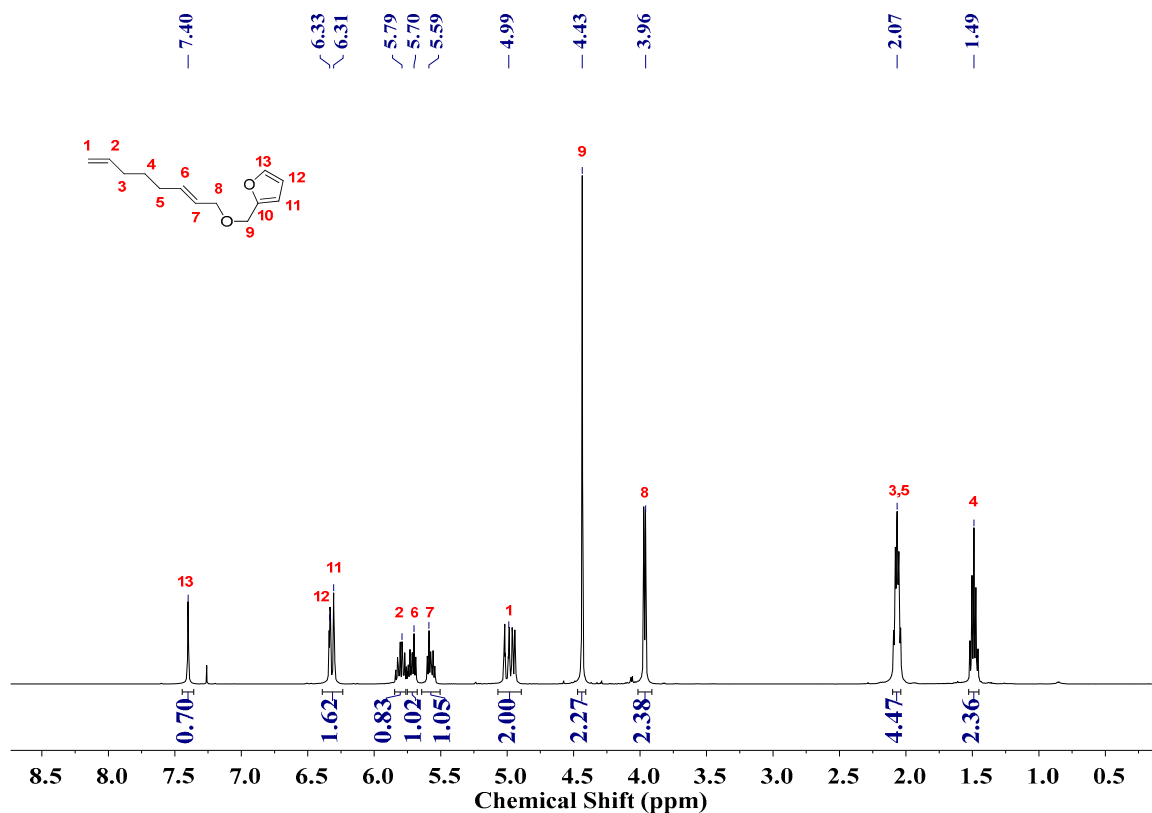

**Figure S4.** <sup>1</sup>H NMR spectrum of **OC8-FUR** in CDCl<sub>3</sub>.

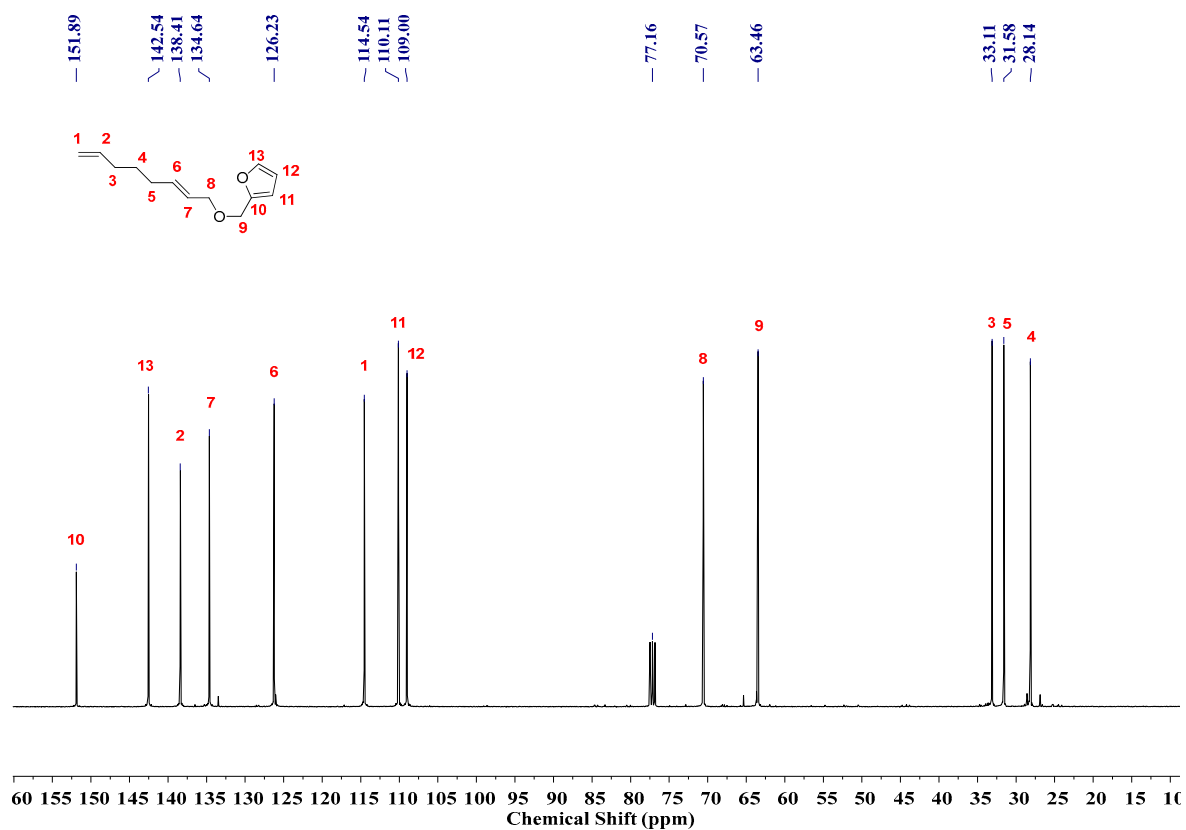

**Figure S5.**  $^{13}\text{C}$  NMR spectrum of OC8-FUR in  $\text{CDCl}_3$ .

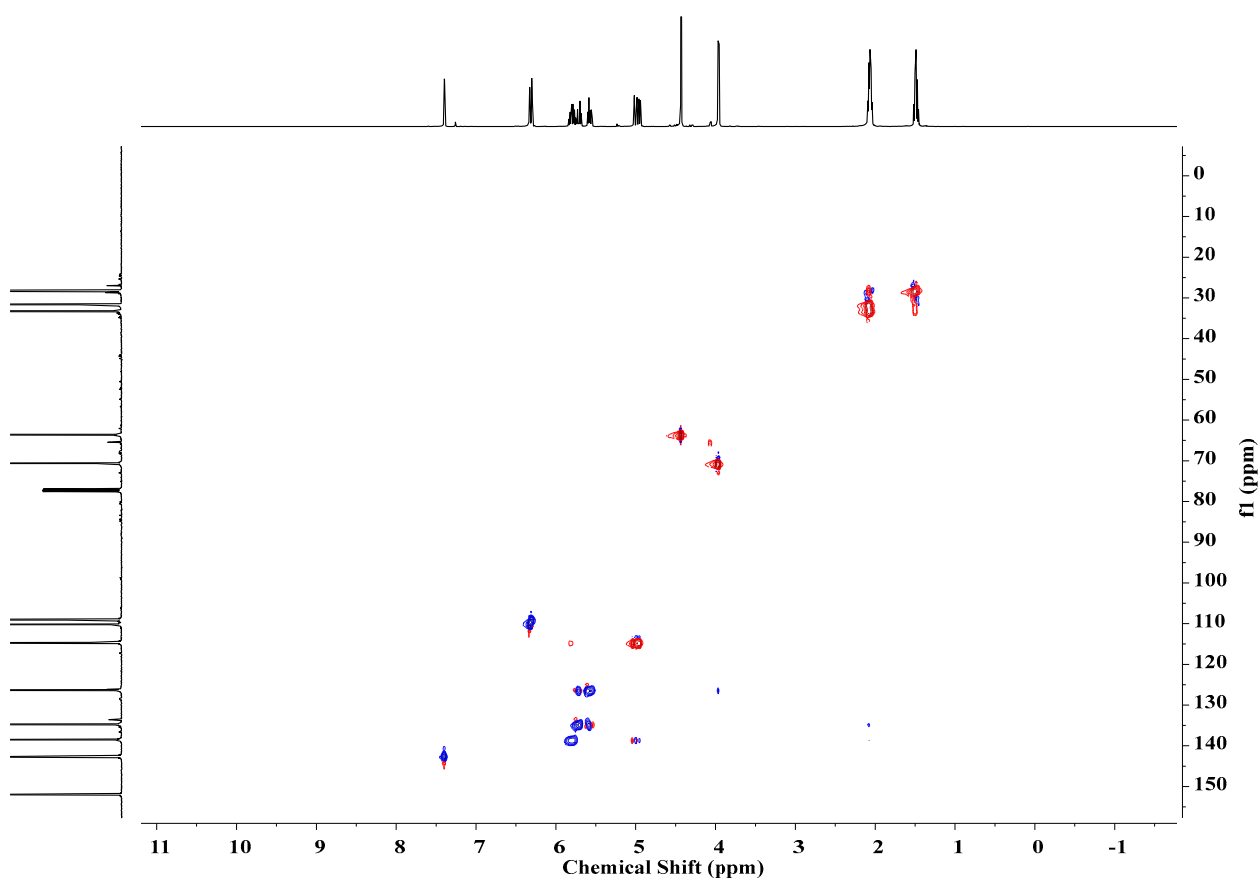

**Figure S6.**  $^1\text{H}$ - $^{13}\text{C}$  HSQC spectrum of OC8-FUR in  $\text{CDCl}_3$ .

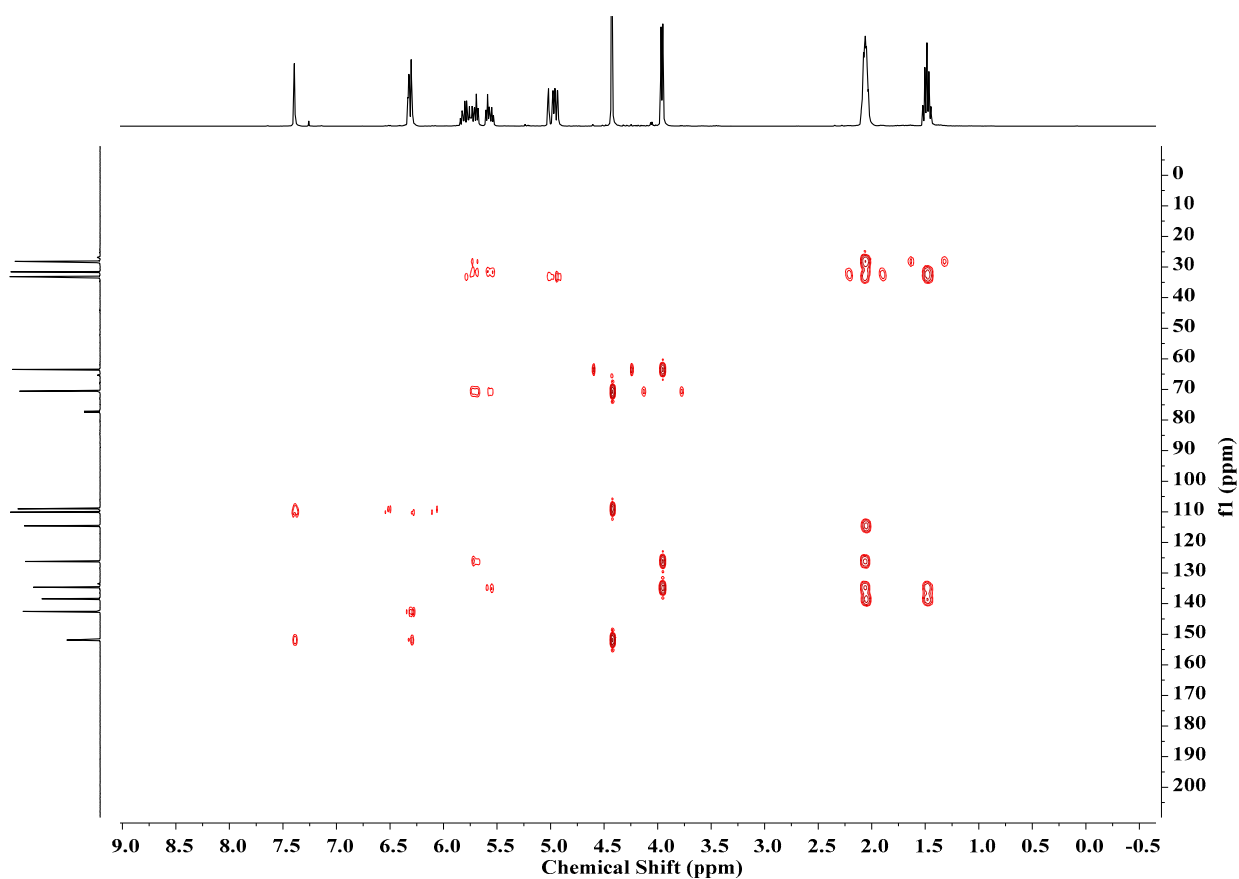

Figure S7.  $^1\text{H}$ - $^{13}\text{C}$  HMBC spectrum of **OC8-FUR** in  $\text{CDCl}_3$ .

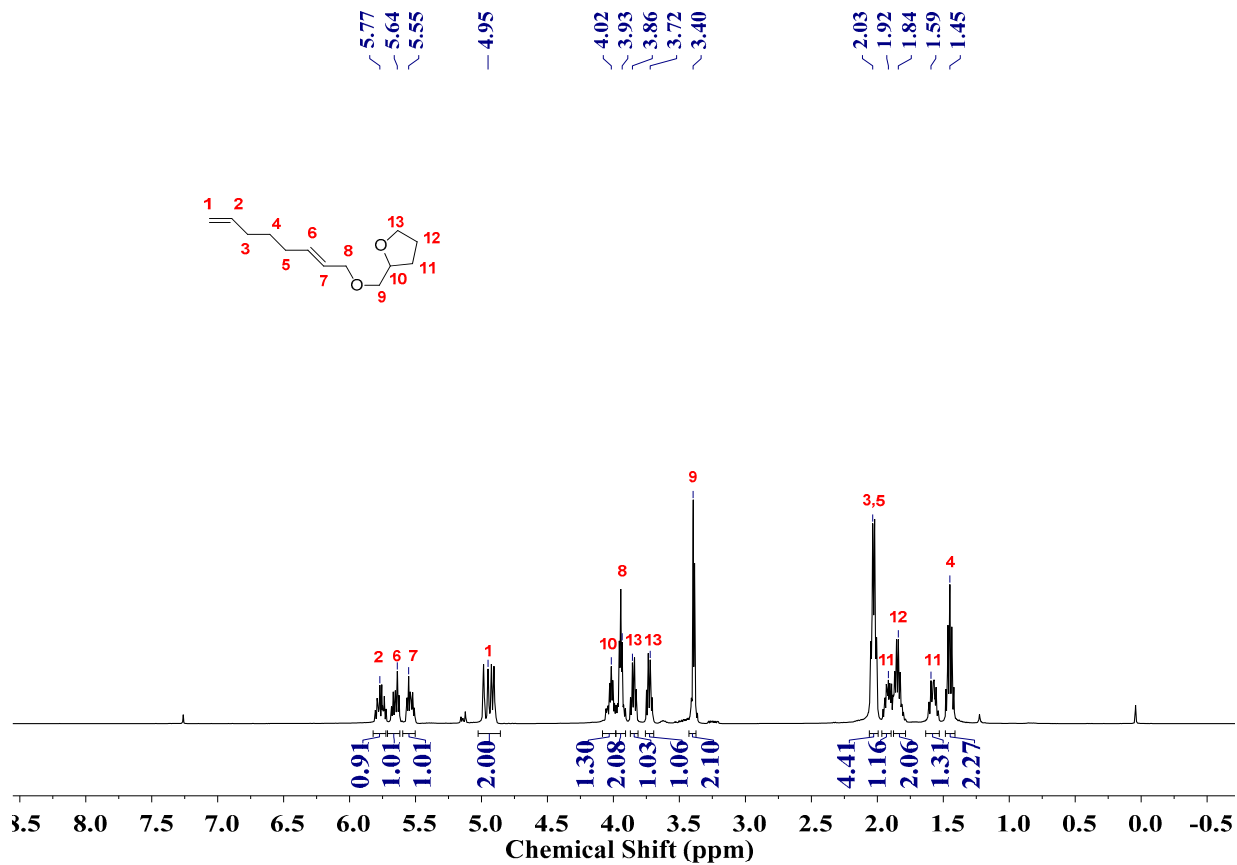

Figure S8.  $^1\text{H}$  NMR spectrum of **OC8-THF** in  $\text{CDCl}_3$ .

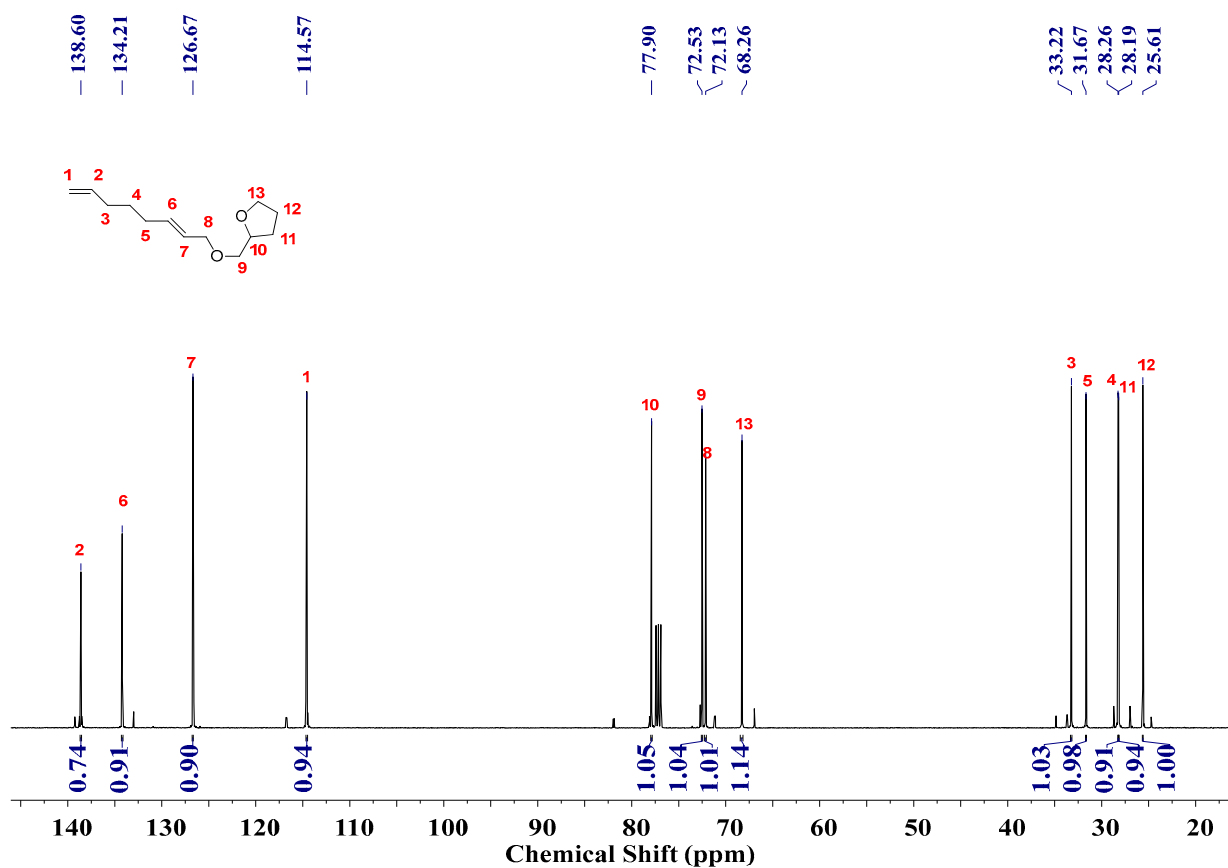

Figure S9.  $^{13}\text{C}$  NMR spectrum of OC8-THF in  $\text{CDCl}_3$ .

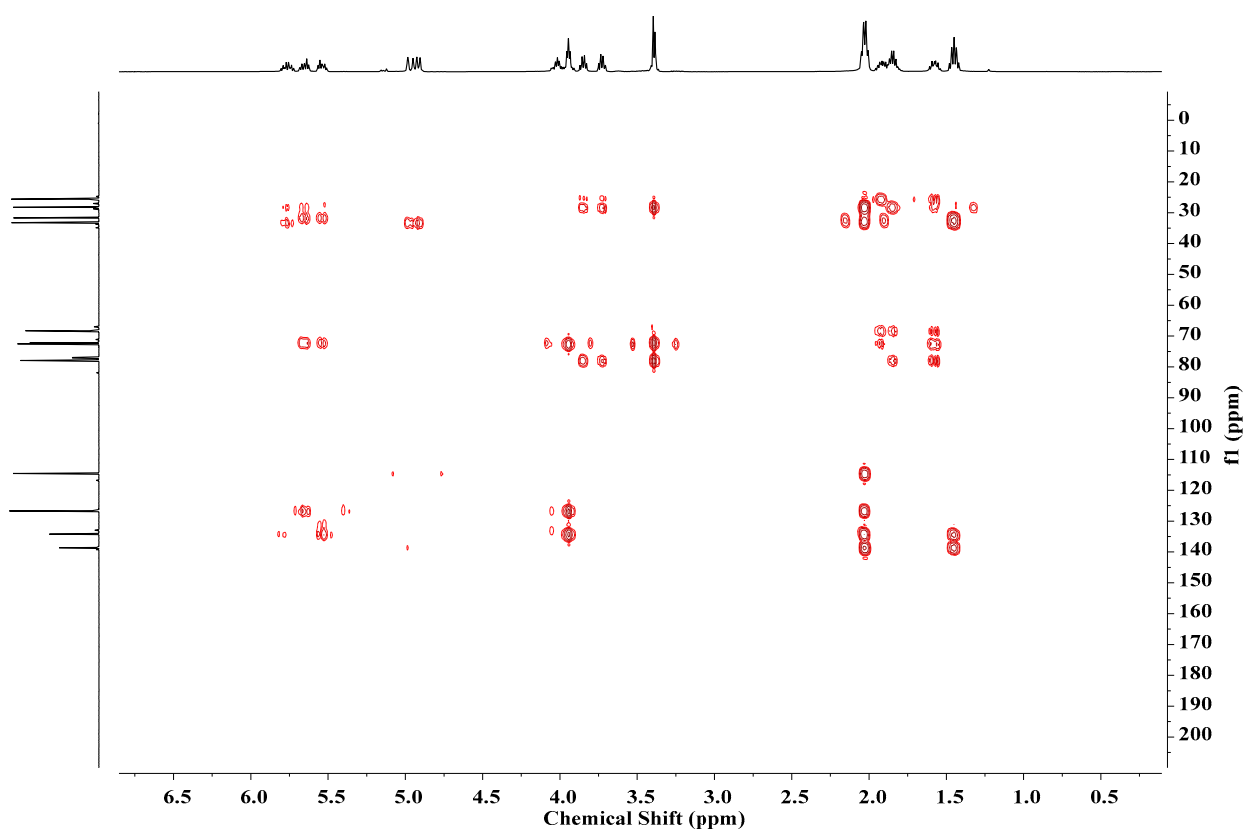

Figure S10.  $^1\text{H}$ - $^{13}\text{C}$  HMBC spectrum of OC8-THF in  $\text{CDCl}_3$ .

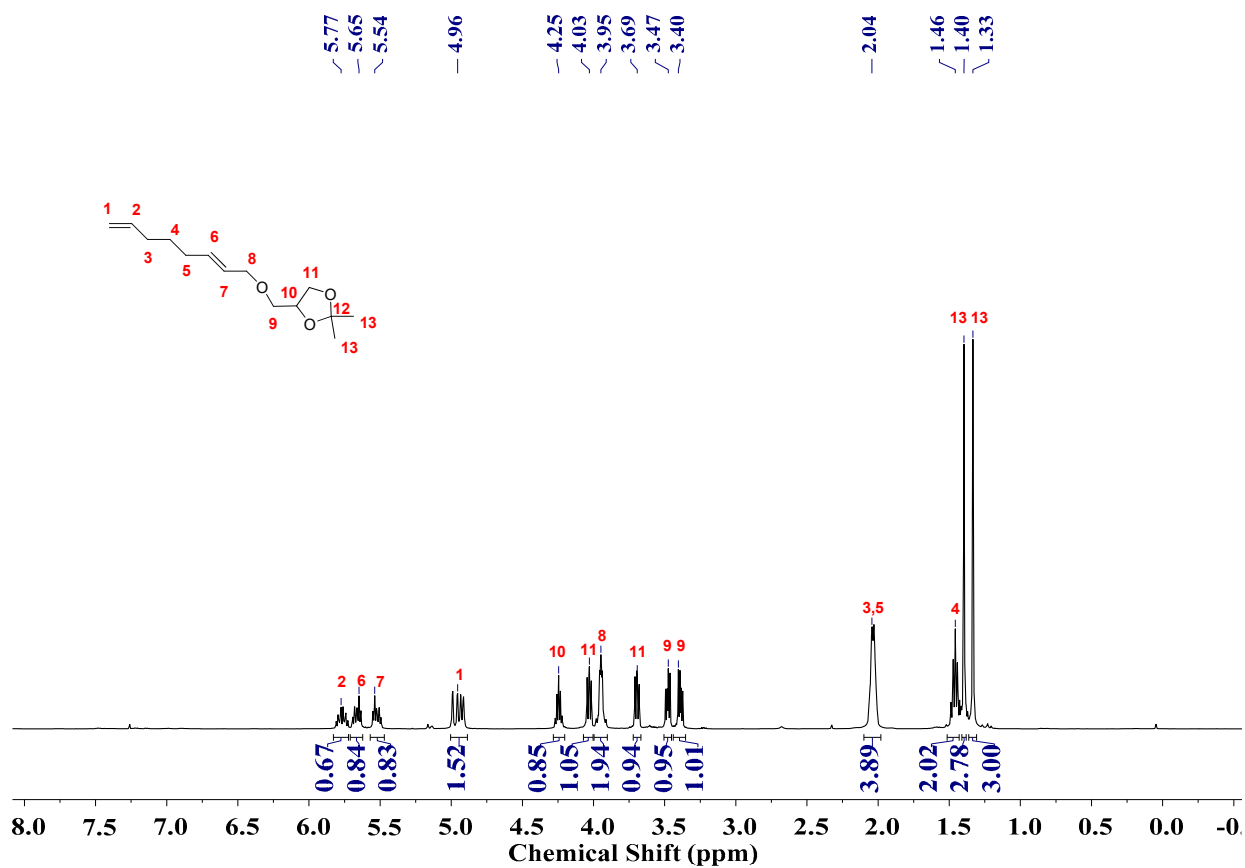

Figure S11. <sup>1</sup>H NMR spectrum of OC8-SOL in CDCl<sub>3</sub>.

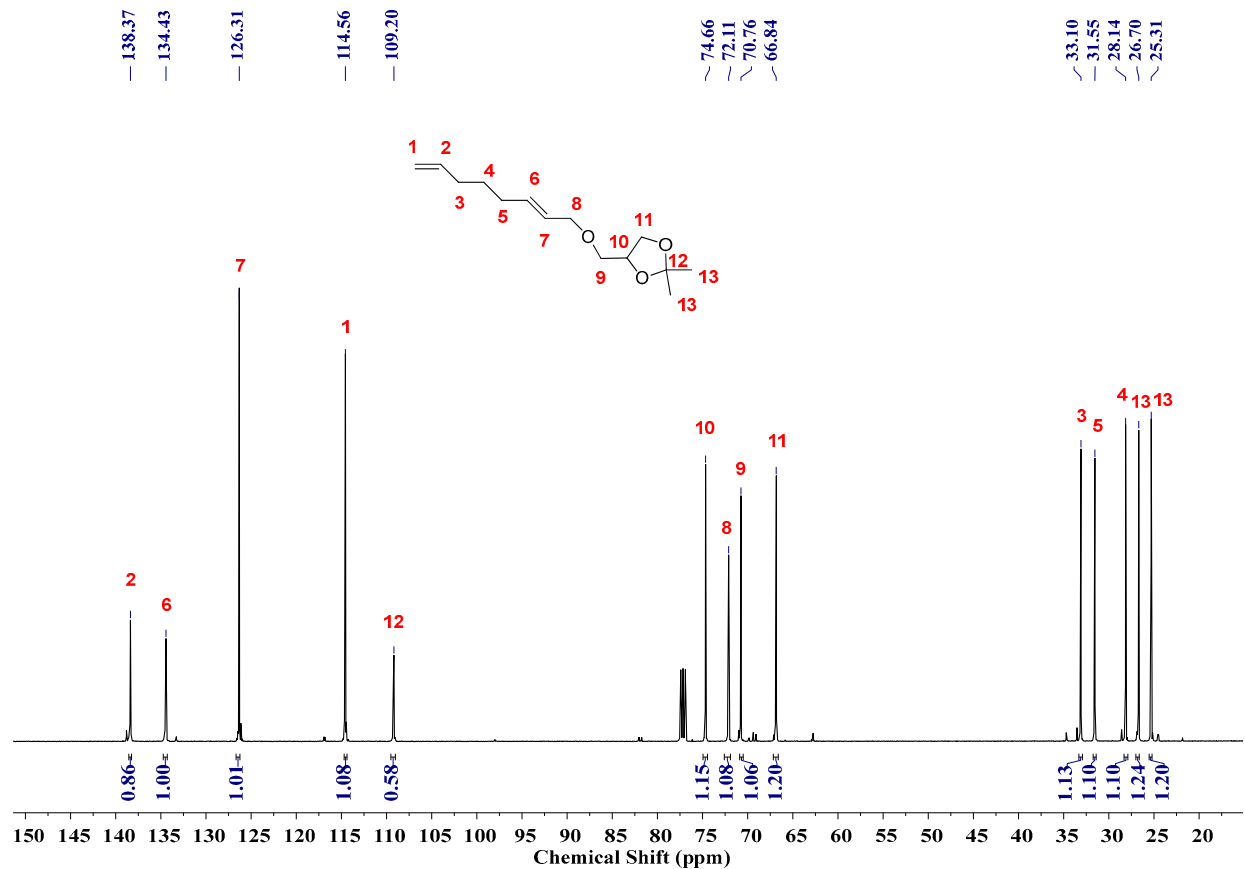

Figure S12. <sup>13</sup>C NMR spectrum of OC8-SOL in CDCl<sub>3</sub>.

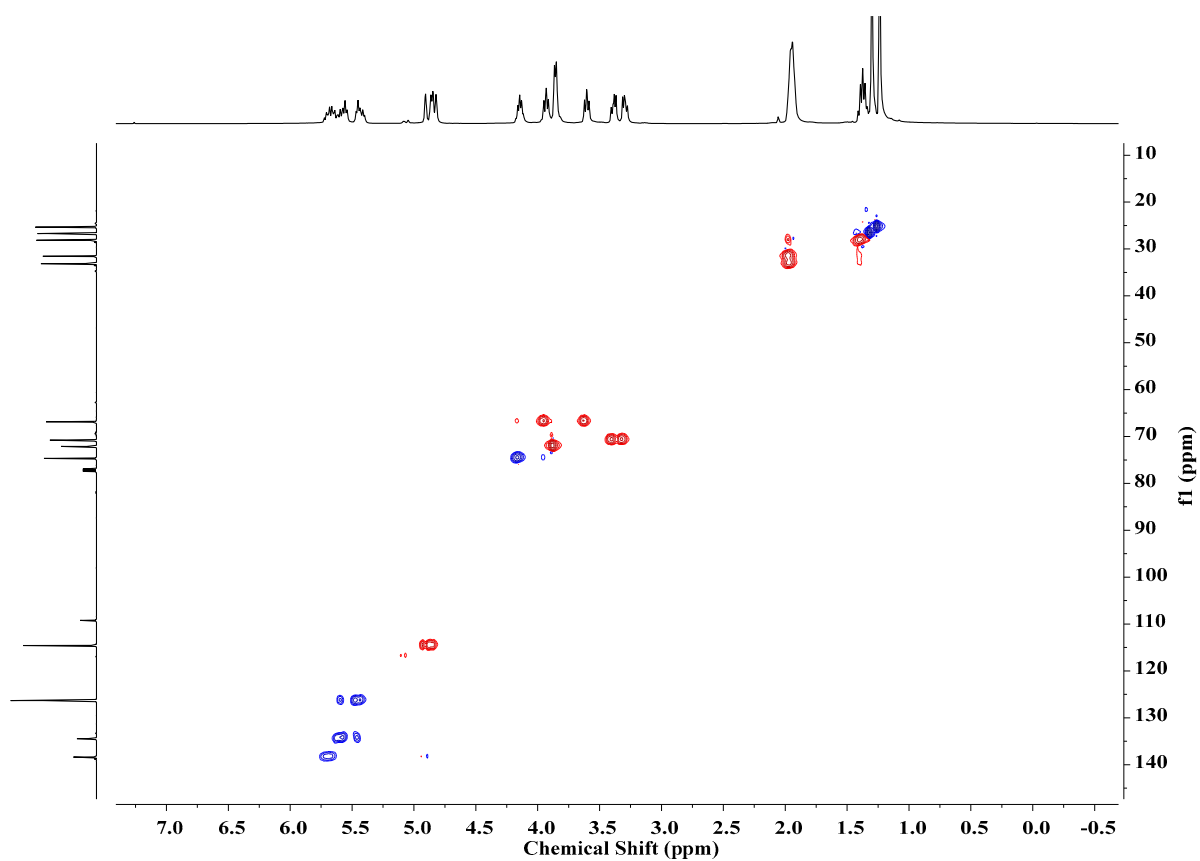

**Figure S13.**  $^1\text{H}$ - $^{13}\text{C}$  HSQC spectrum of **OC8-SOL** in  $\text{CDCl}_3$ .

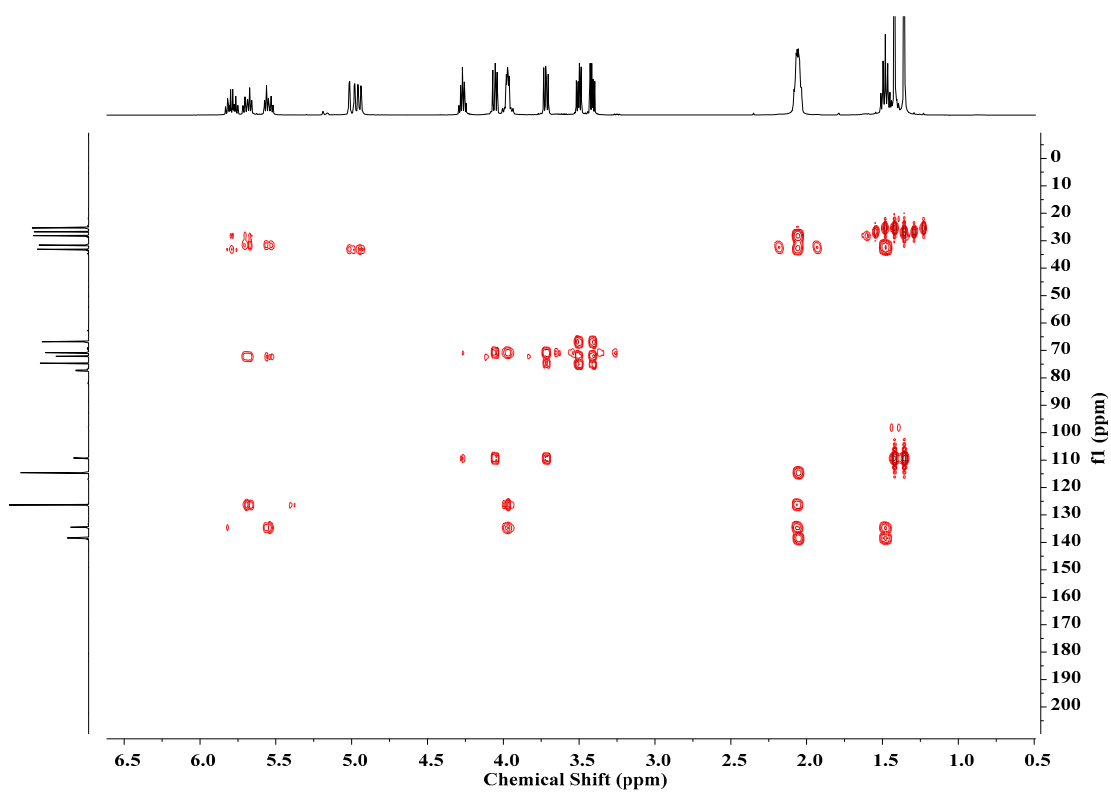

**Figure S14.**  $^1\text{H}$ - $^{13}\text{C}$  HMBC spectrum of **OC8-SOL** in  $\text{CDCl}_3$ .



### 3. NMR figures of copolymers

$$\text{brs} = \text{Me groups}/1000\text{C} = \frac{2 \cdot I_{\text{Me}}}{3 \cdot I_{\text{tot}}} \cdot 1000 = \frac{2 \cdot 3.60}{3 \cdot 398.63} \cdot 1000 = 6.0$$

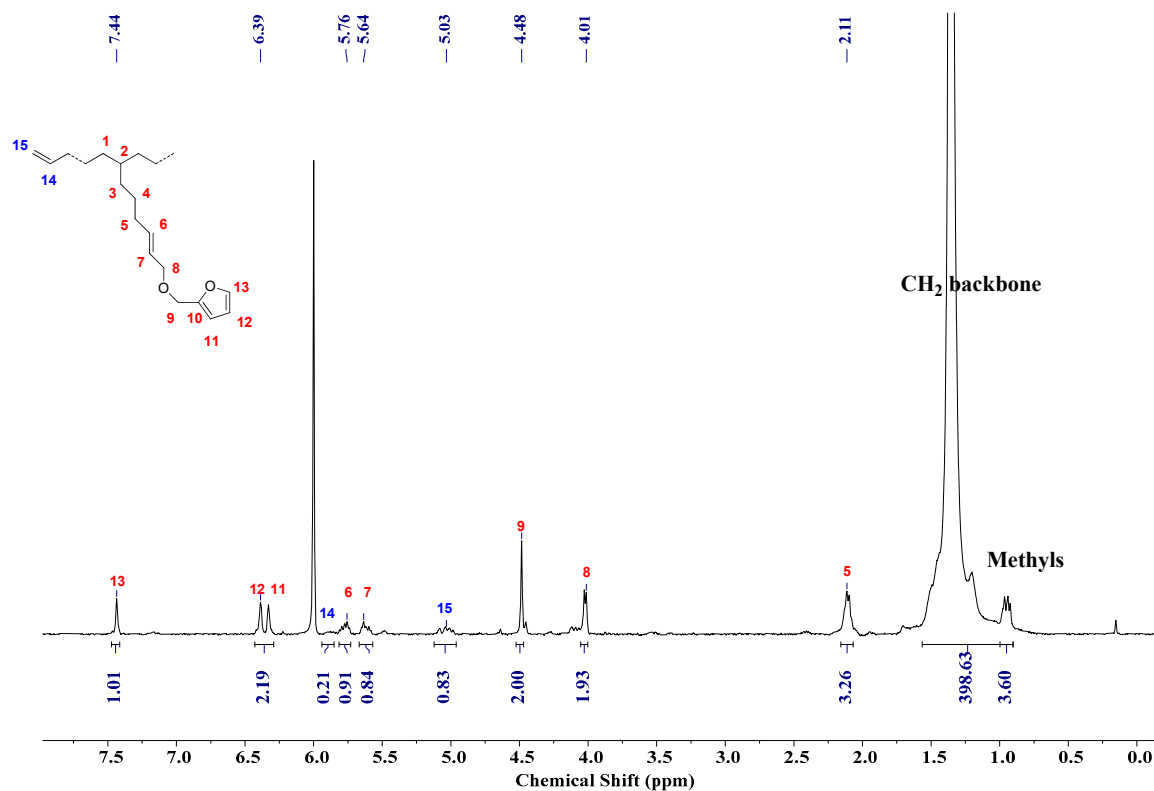

**Figure S15.** <sup>1</sup>H NMR spectrum (400 MHz, 110 °C, C<sub>2</sub>D<sub>2</sub>Cl<sub>4</sub>) of copolymer from table 1, entry 3.

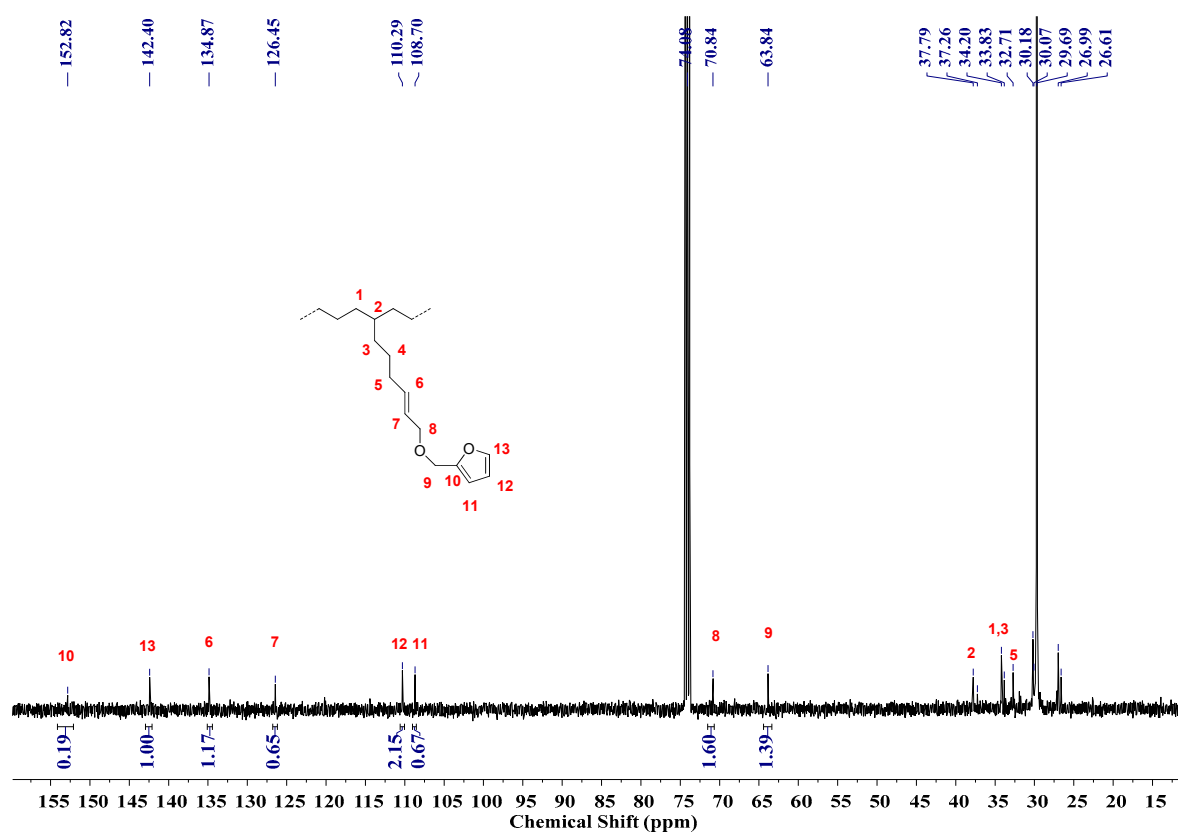

**Figure S16.** <sup>13</sup>C NMR spectrum (100 MHz, 110 °C, C<sub>2</sub>D<sub>2</sub>Cl<sub>4</sub>) of copolymer from table 1, entry 3.

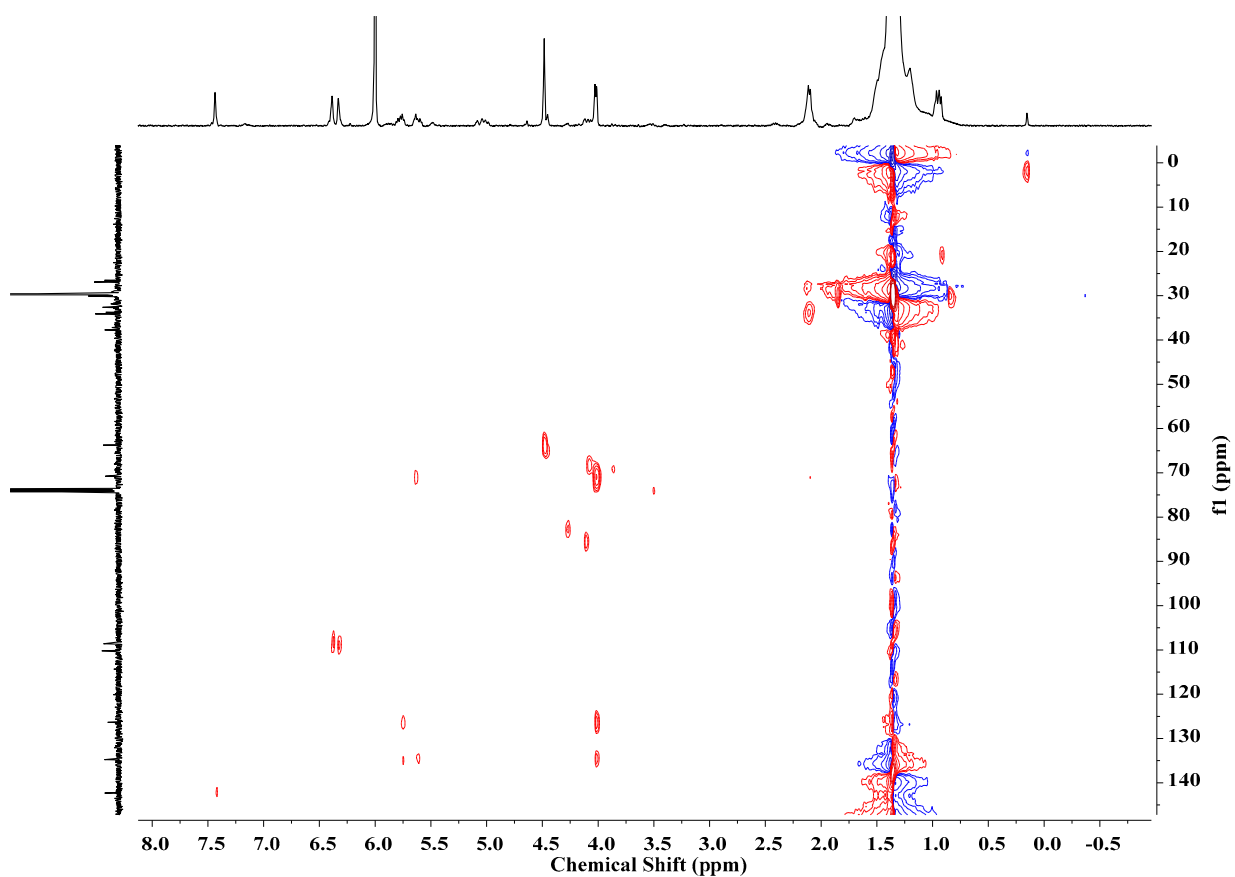

Figure S17.  $^1\text{H}$ - $^{13}\text{C}$  HSQC spectrum (110  $^\circ\text{C}$ ,  $\text{C}_2\text{D}_2\text{Cl}_4$ ) of copolymer from table 1, entry 3.

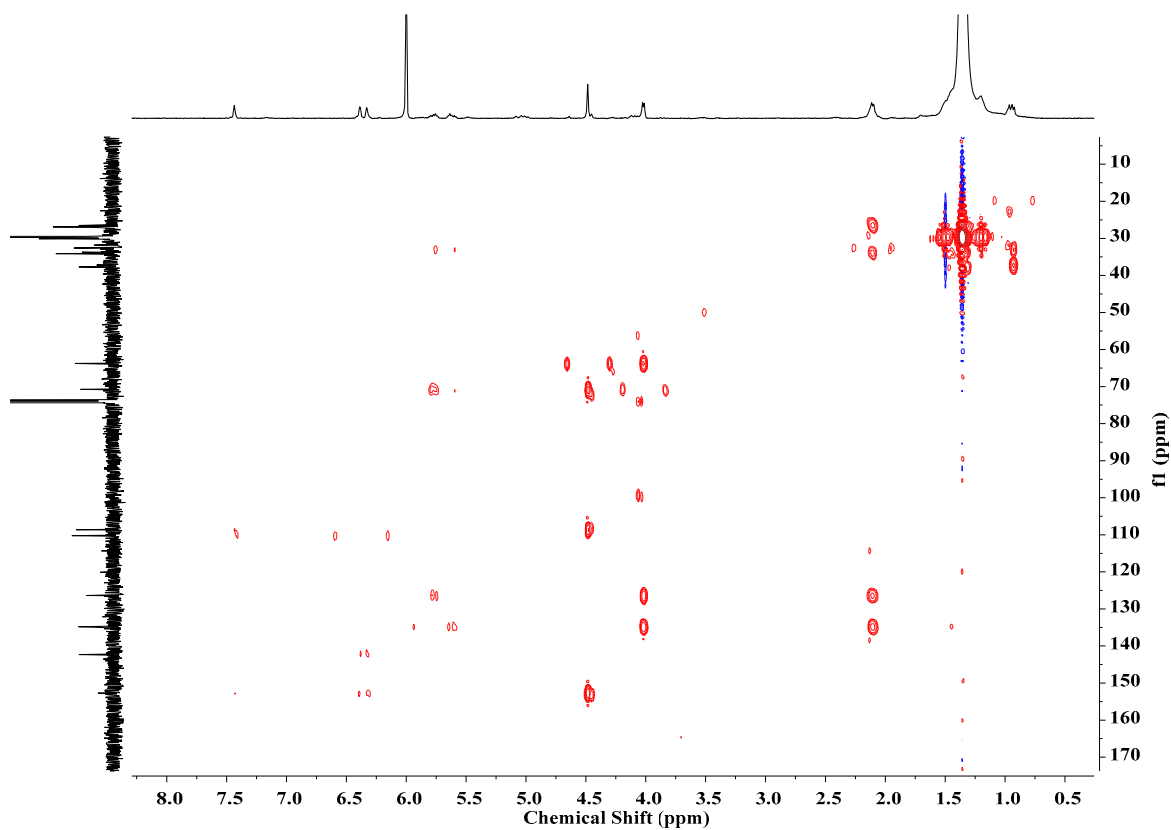

Figure S18.  $^1\text{H}$ - $^{13}\text{C}$  HMBC spectrum (110  $^\circ\text{C}$ ,  $\text{C}_2\text{D}_2\text{Cl}_4$ ) of copolymer from table 1, entry 3.

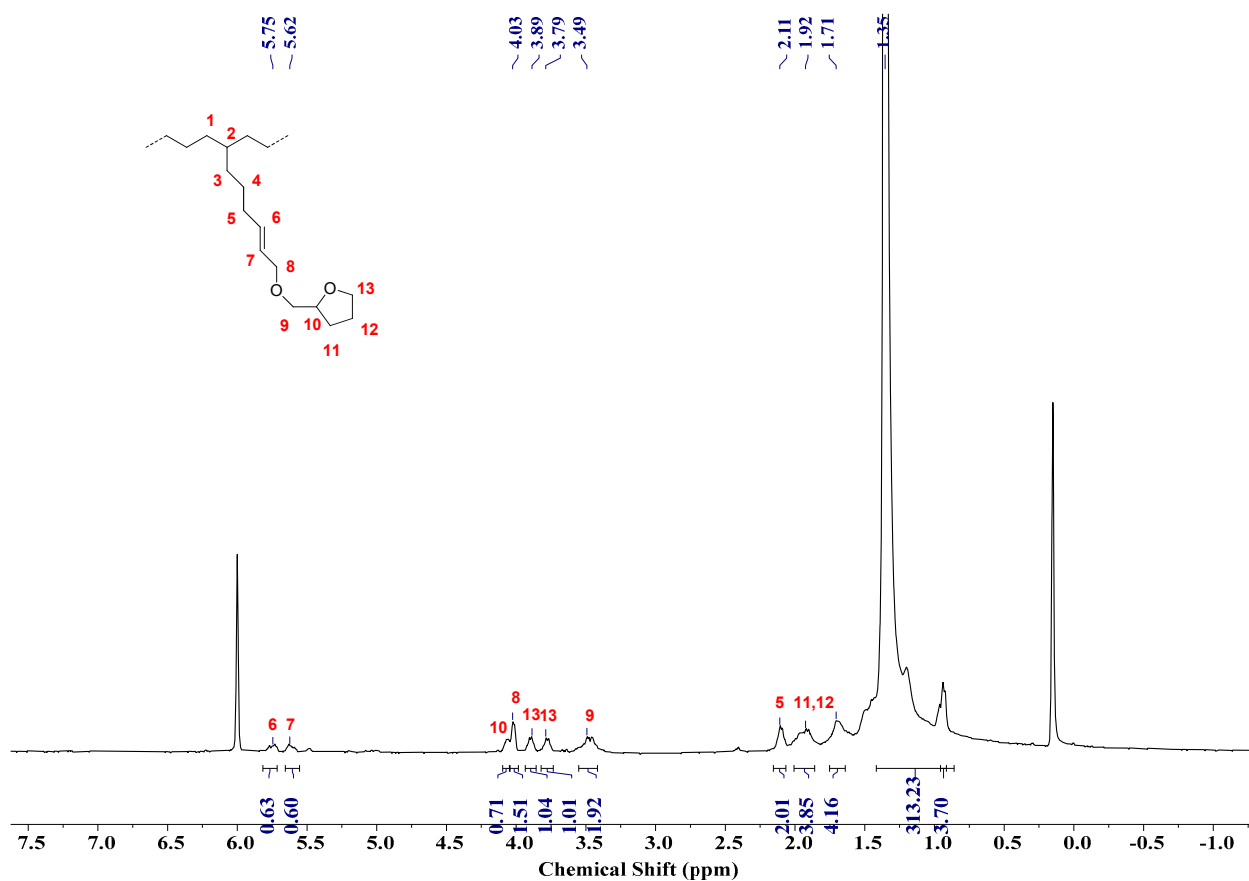

**Figure S19.**  $^1\text{H}$  NMR spectrum (400 MHz,  $110^\circ\text{C}$ ,  $\text{C}_2\text{D}_2\text{Cl}_4$ ) of copolymer from table 1, entry 4.

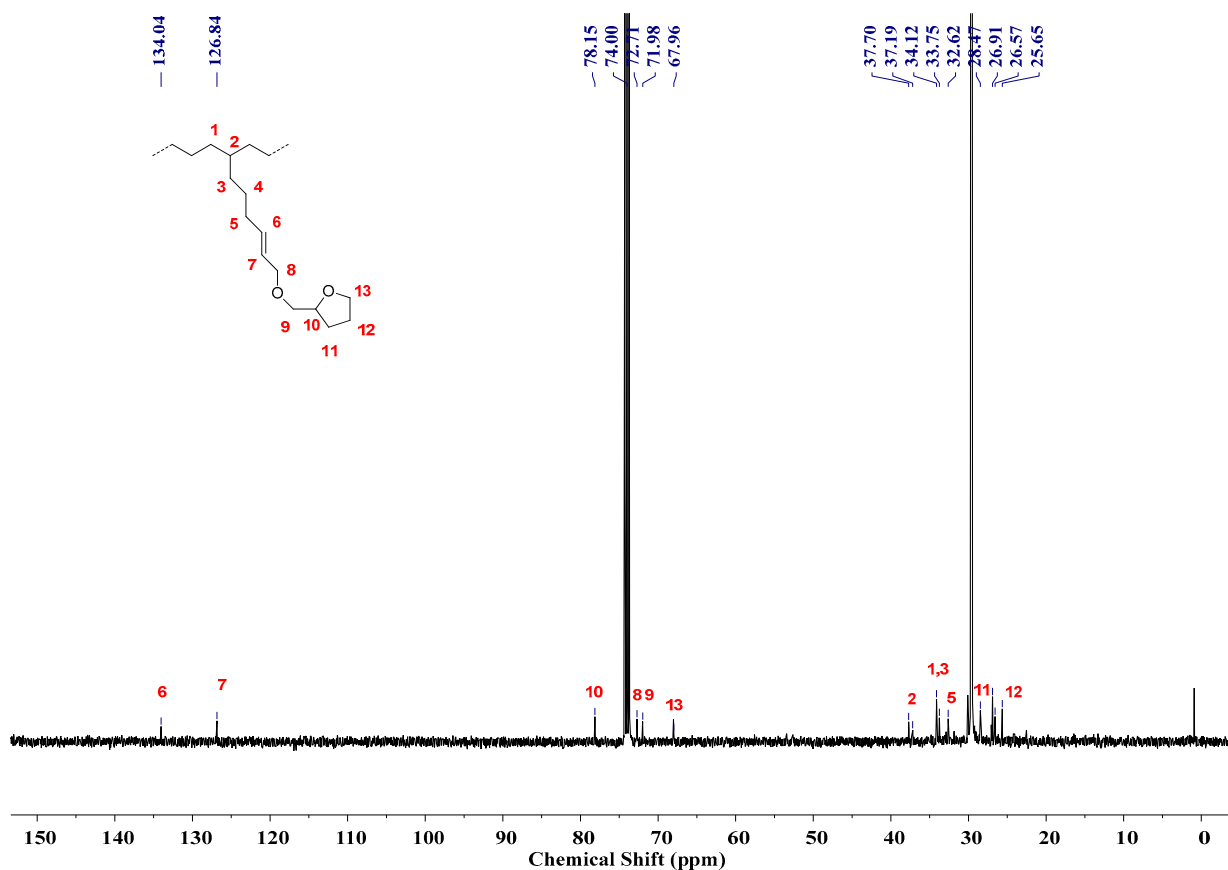

**Figure S20.**  $^{13}\text{C}$  NMR spectrum (100 MHz,  $110^\circ\text{C}$ ,  $\text{C}_2\text{D}_2\text{Cl}_4$ ) of copolymer from table 1, entry 4.

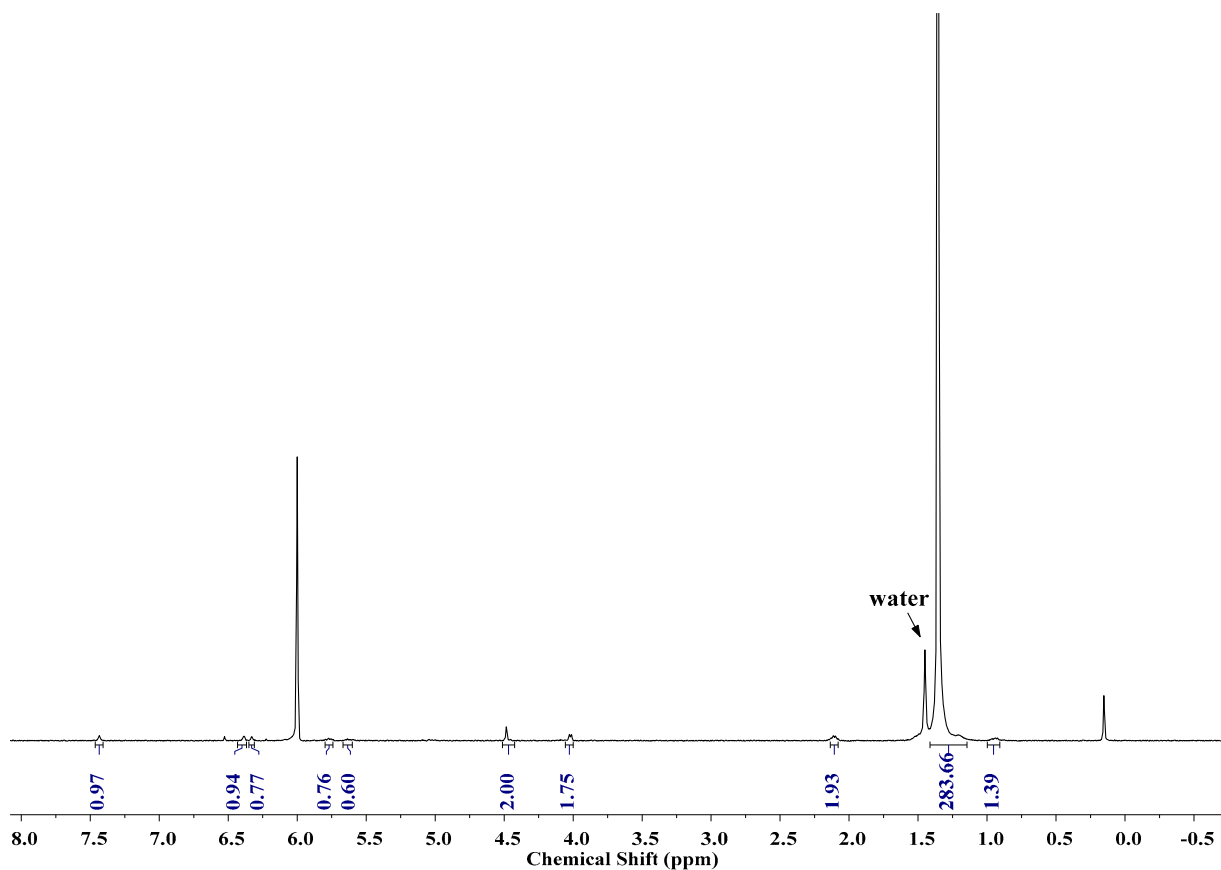

**Figure S21.**  $^1\text{H}$  NMR spectrum (400 MHz, 110  $^\circ\text{C}$ ,  $\text{C}_2\text{D}_2\text{Cl}_4$ ) of copolymer from table 1, entry 7.

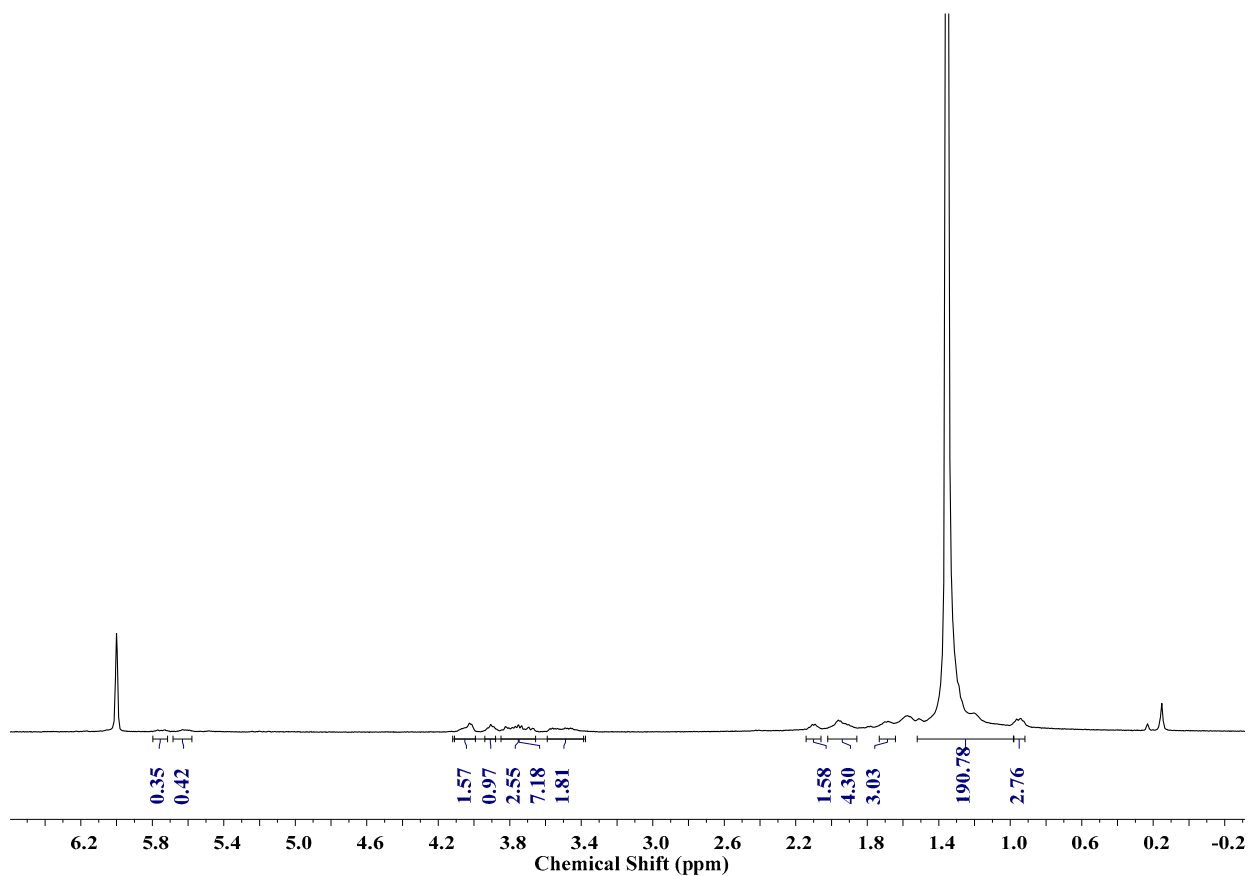

**Figure S22**  $^1\text{H}$  NMR spectrum (400 MHz, 110  $^\circ\text{C}$ ,  $\text{C}_2\text{D}_2\text{Cl}_4$ ) of copolymer from table 1, entry 9.

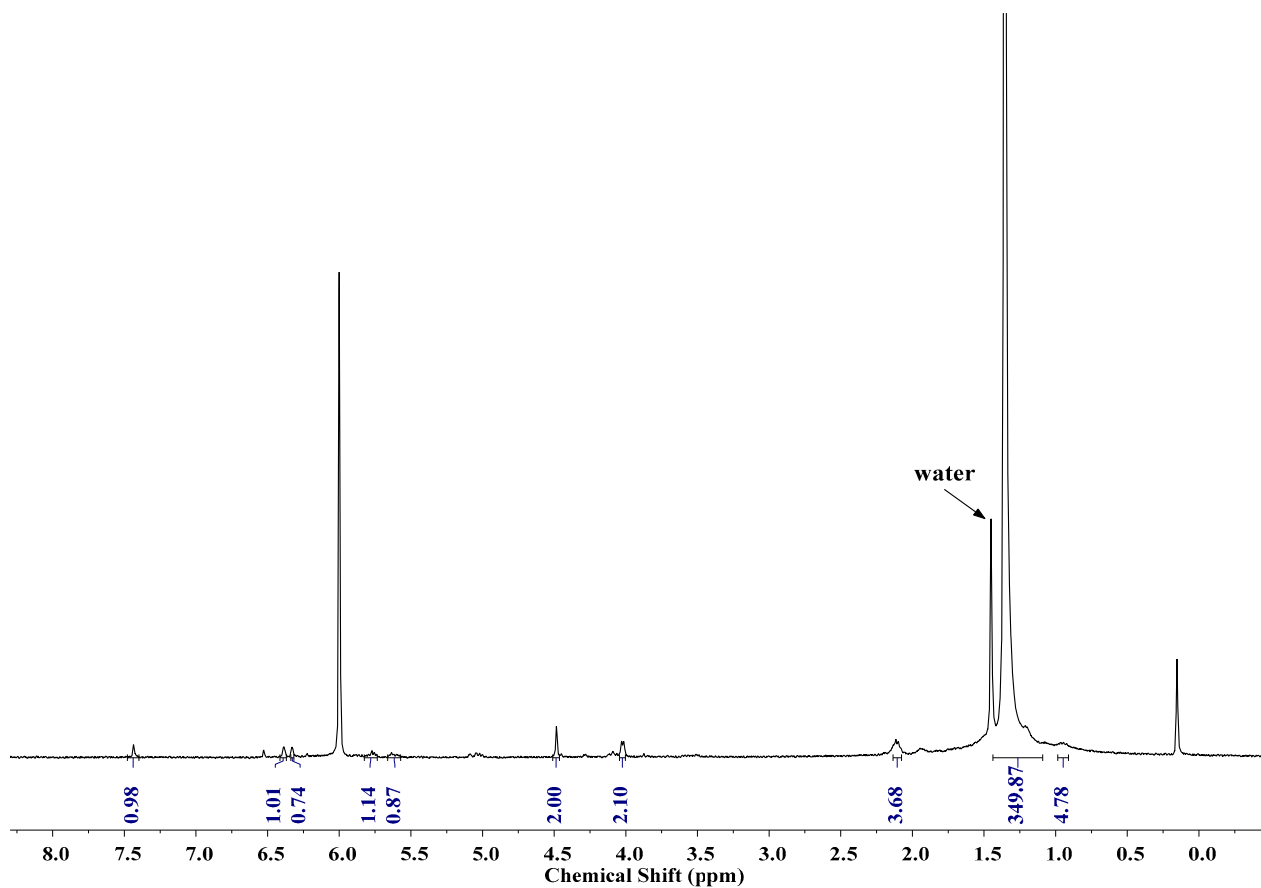

**Figure S23.**  $^1\text{H}$  NMR spectrum (400 MHz, 110  $^\circ\text{C}$ ,  $\text{C}_2\text{D}_2\text{Cl}_4$ ) copolymer from table 1, entry 13.

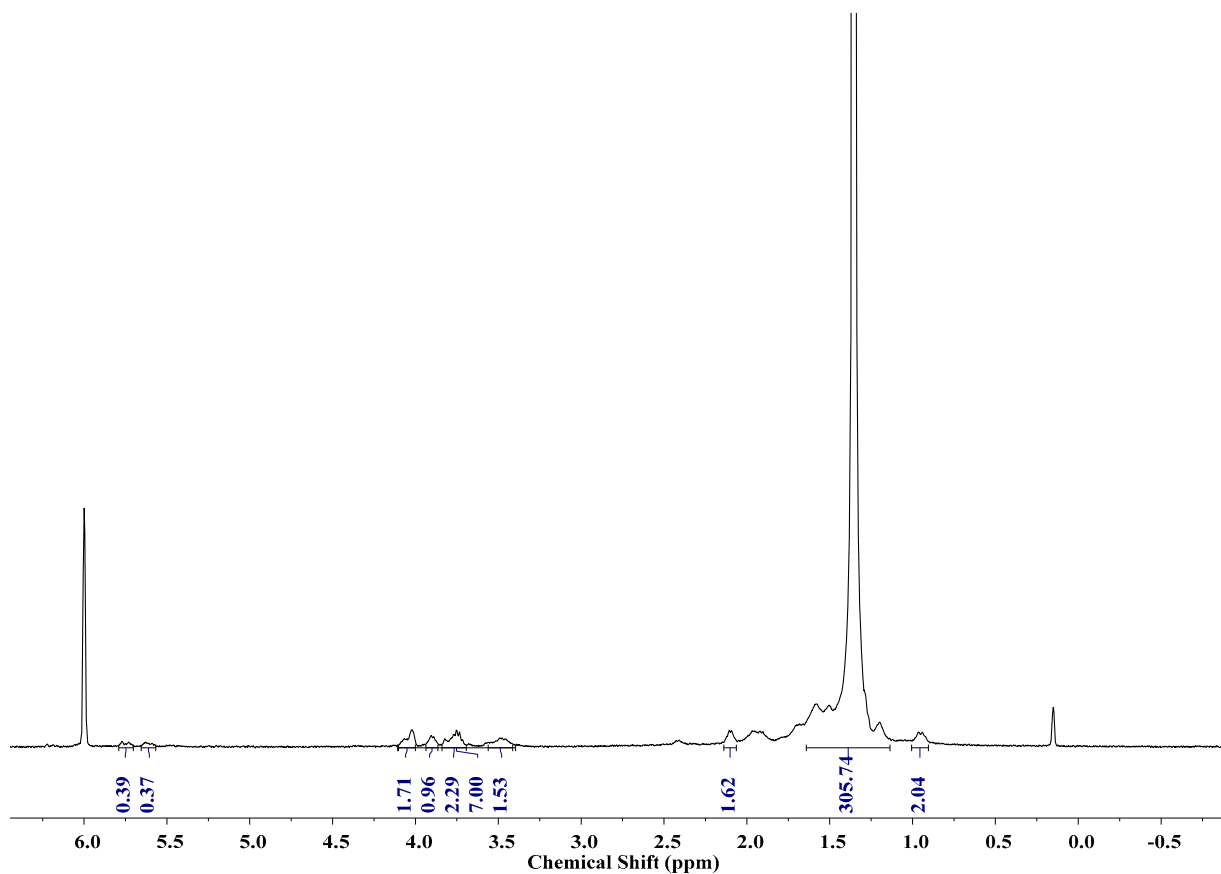

**Figure S24.**  $^1\text{H}$  NMR spectrum (400 MHz, 110  $^\circ\text{C}$ ,  $\text{C}_2\text{D}_2\text{Cl}_4$ ) copolymer from table 1, entry 14.

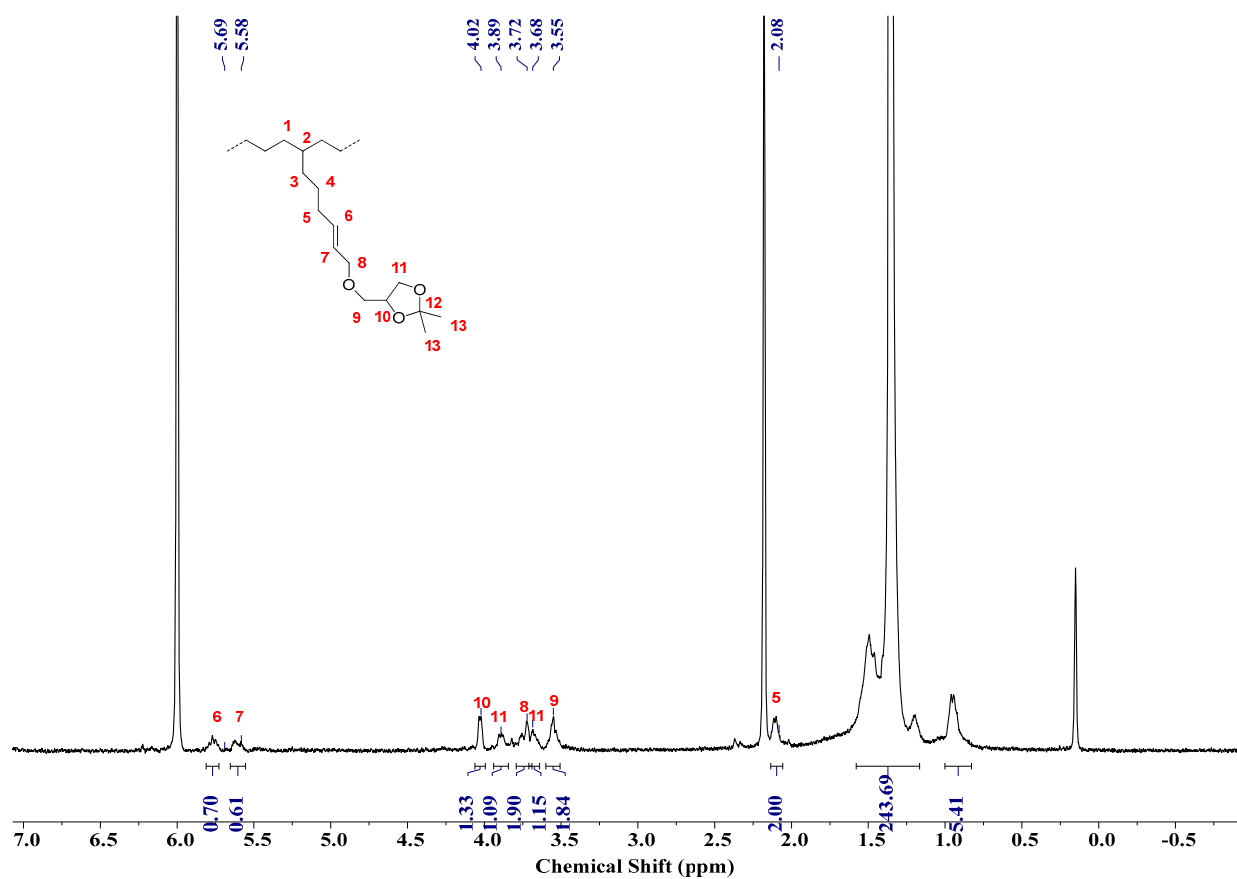

**Figure S25.** <sup>1</sup>H NMR spectrum (400 MHz, 110 °C, C<sub>2</sub>D<sub>2</sub>Cl<sub>4</sub>) of copolymer from table 1, entry 15.

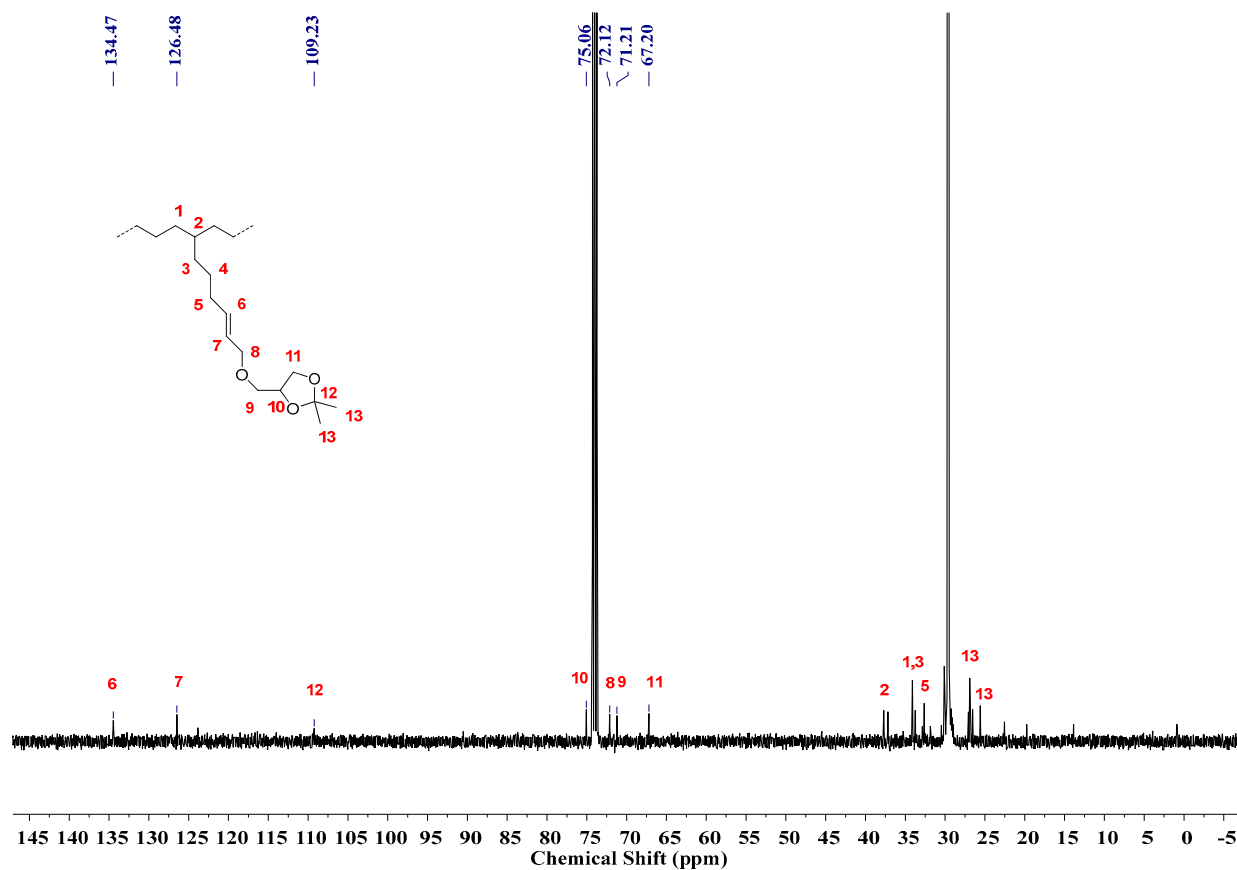

**Figure S26.** <sup>13</sup>C NMR spectrum (100 MHz, 110 °C, C<sub>2</sub>D<sub>2</sub>Cl<sub>4</sub>) of copolymer from table 1, entry 15.

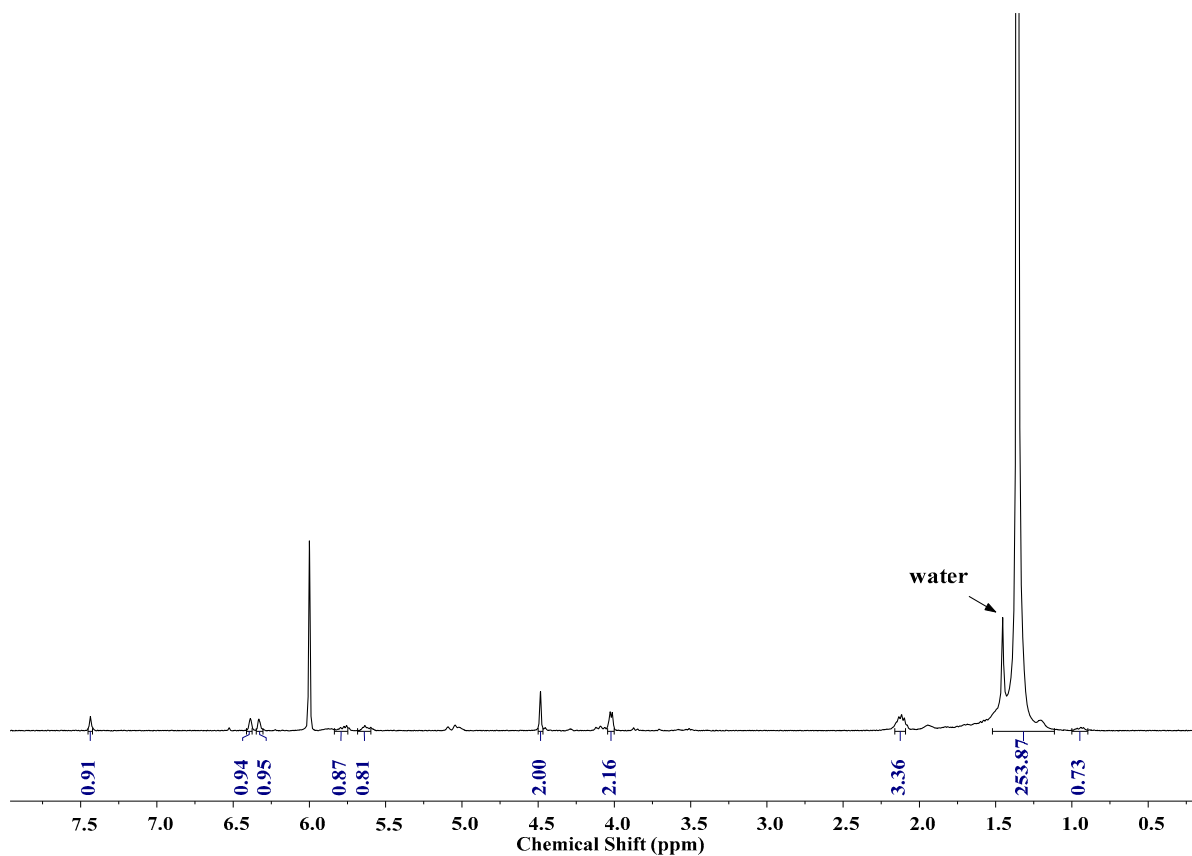

**Figure S27.**  $^1\text{H}$  NMR spectrum (400 MHz, 110  $^{\circ}\text{C}$ ,  $\text{C}_2\text{D}_2\text{Cl}_4$ ) copolymer from table 1, entry 17.

#### 4. GPC figures of copolymers

##### MW Averages

Mp: 19494      Mn: 11844      Mv: 20430      Mw: 22032  
Mz: 35950      Mz+1: 51599      PD: 1.8602

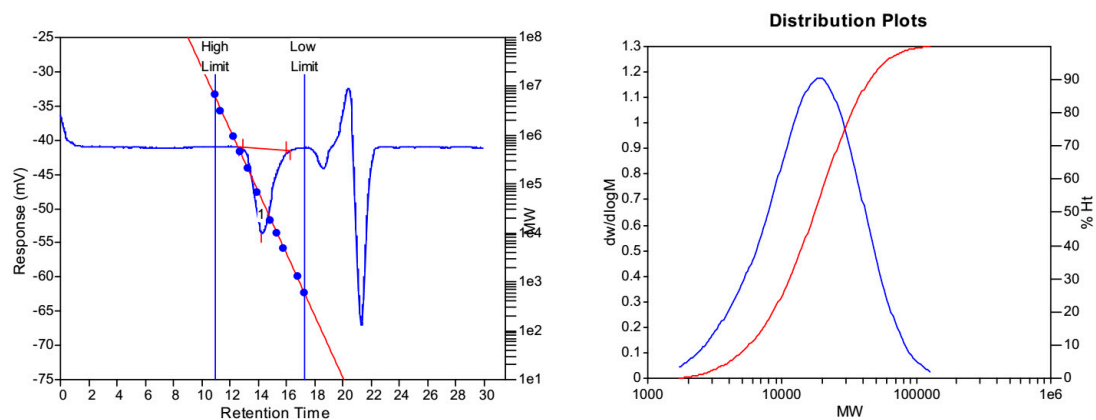

Figure S28. GPC trace of the polymer from table 1, entry 1.

Mp: 12851      Mn: 7235      Mv: 14508      Mw: 15965  
Mz: 30487      Mz+1: 52769      PD: 2.2066

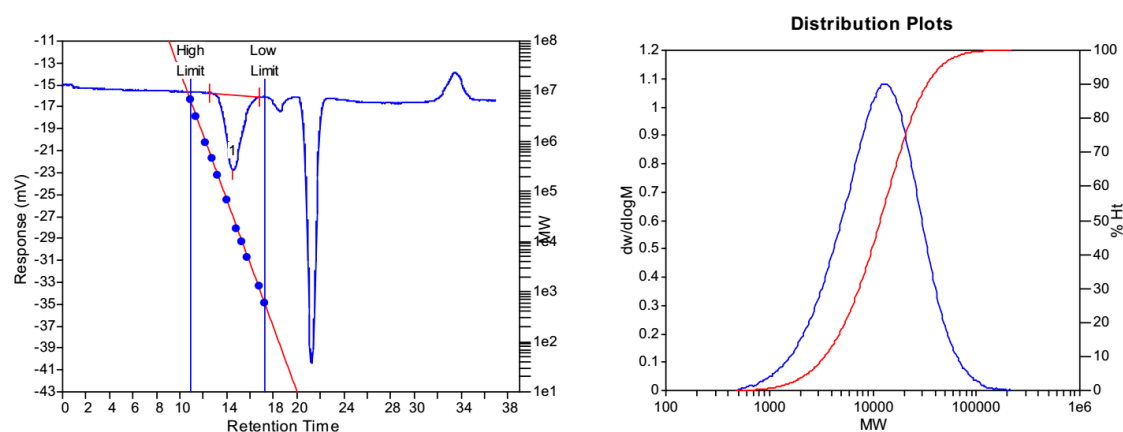

Figure S29. GPC trace of the polymer from table 1, entry 3.

Mp: 12254      Mn: 6715      Mv: 13256      Mw: 14516  
Mz: 26763      Mz+1: 45471      PD: 2.1617

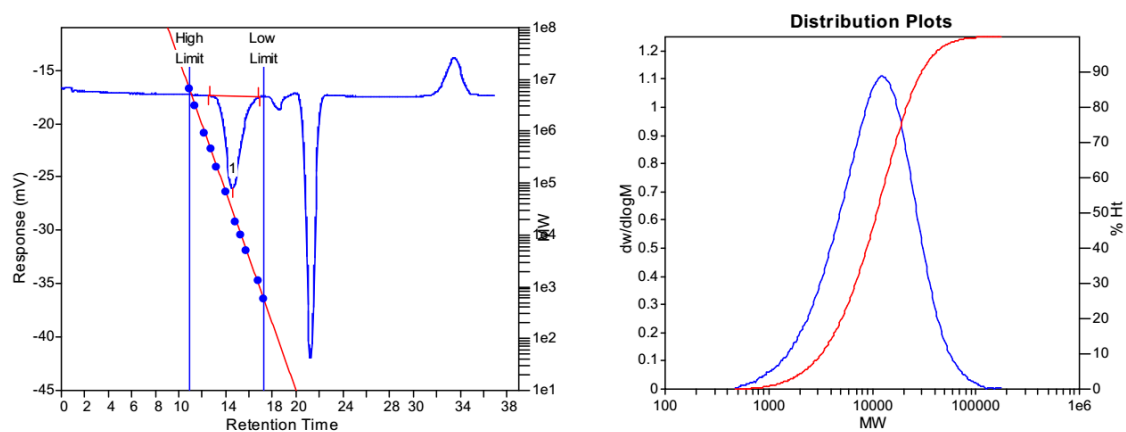

Figure S30. GPC trace of the polymer from table 1, entry 4.



**MW Averages**

Mp: 12549      Mn: 6515      Mv: 12873      Mw: 14079  
Mz: 25412      Mz+1: 40926      PD: 2.1610

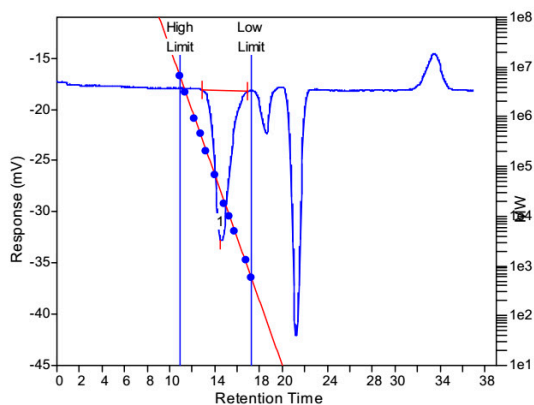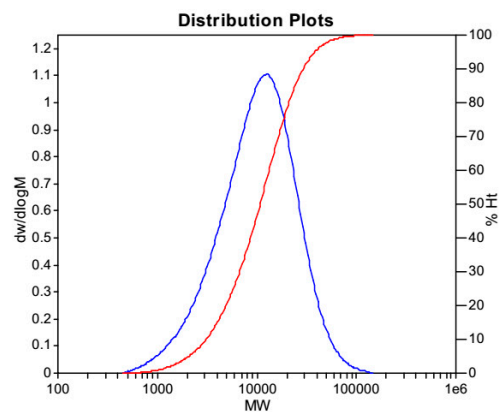

Figure S31. GPC trace of the polymer from table 1, entry 5.

**MW Averages**

Mp: 37815      Mn: 22456      Mv: 43593      Mw: 47938  
Mz: 89986      Mz+1: 144388      PD: 2.1348

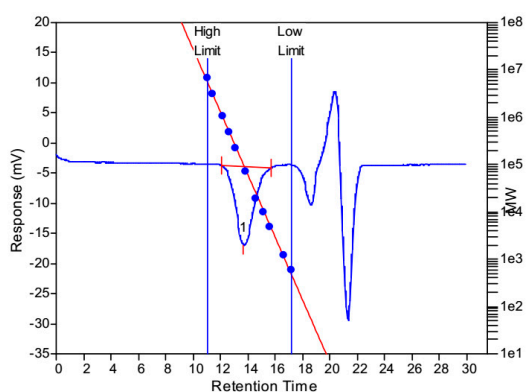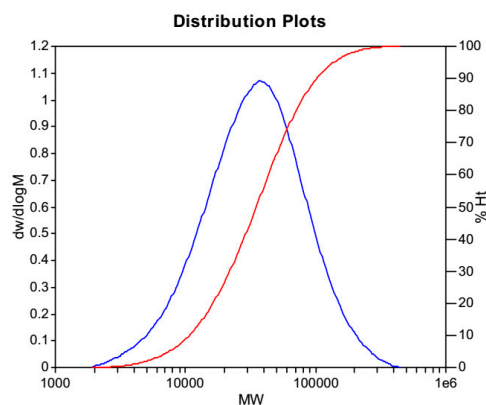

Figure S32. GPC trace of the polymer from table 1, entry 8.

**MW Averages**

Mp: 26790      Mn: 15783      Mv: 30458      Mw: 33396  
Mz: 62781      Mz+1: 109686      PD: 2.1159

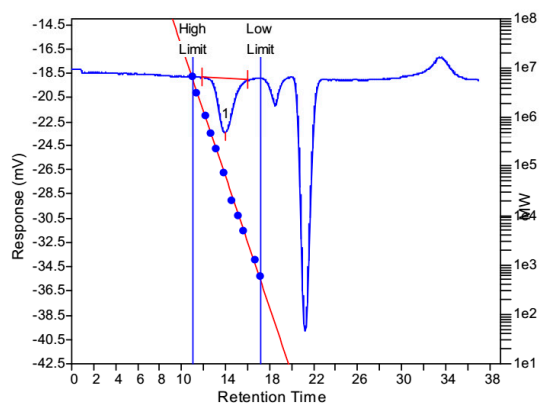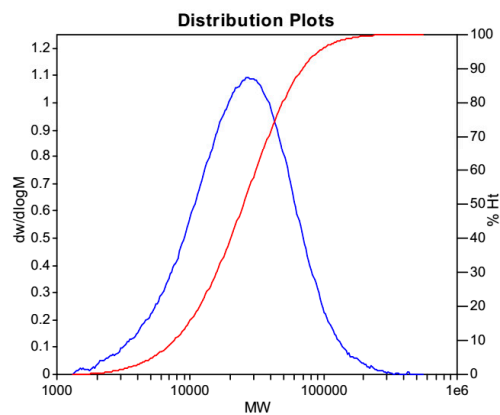

Figure S33. GPC trace of the polymer from table 1, entry 9.

**MW Averages**

Mp: 53479

Mn: 28184

Mv: 55946

Mw: 61007

Mz: 107582

Mz+1: 168627

PD: 2.1646

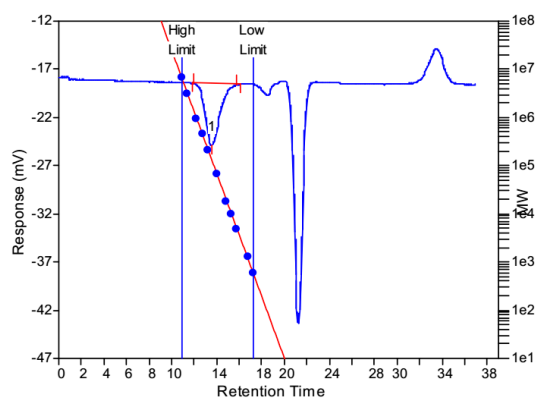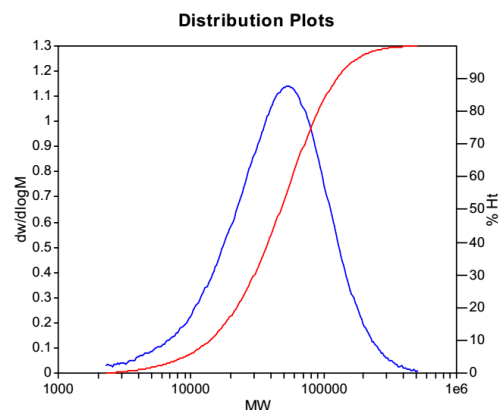

Figure S34. GPC trace of the polymer from table 1, entry 10.

**MW Averages**

Mp: 66203

Mn: 40233

Mv: 69988

Mw: 75242

Mz: 118483

Mz+1: 161035

PD: 1.8702

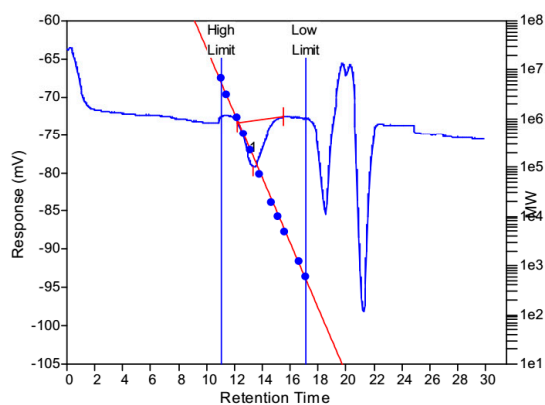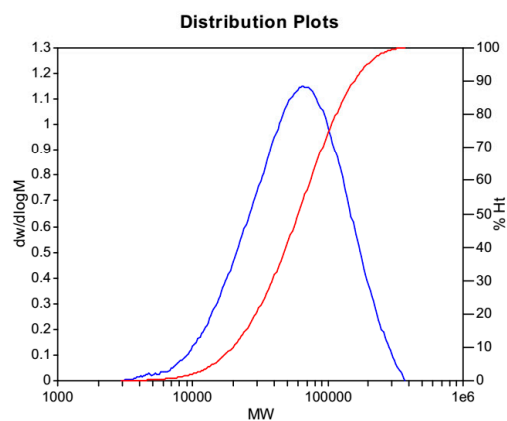

Figure S35. GPC trace of the polymer from table 1, entry 12.

**MW Averages**

Mp: 50813

Mn: 31121

Mv: 55645

Mw: 60510

Mz: 105481

Mz+1: 161228

PD: 1.9443

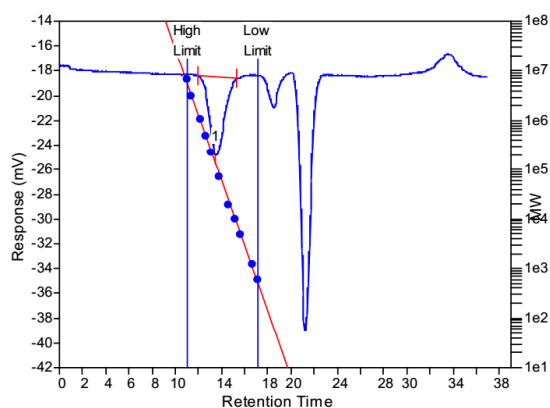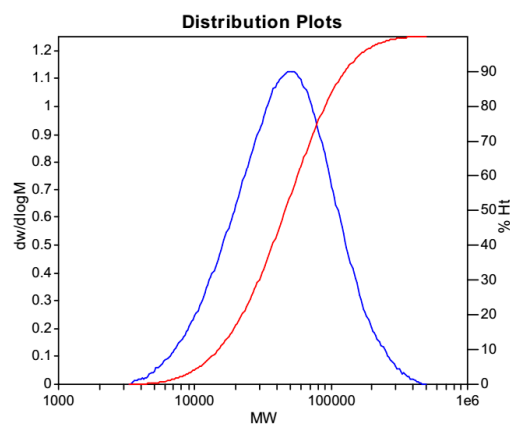

Figure S36. GPC trace of the polymer from table 1, entry 14.

**MW Averages**

Mp: 50813

Mn: 27821

Mv: 54508

Mw: 59771

Mz: 110387

Mz+1: 180459

PD: 2.1484

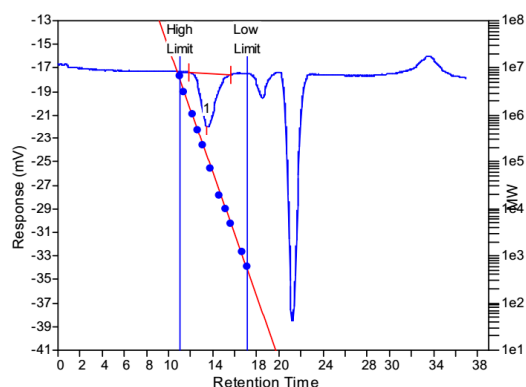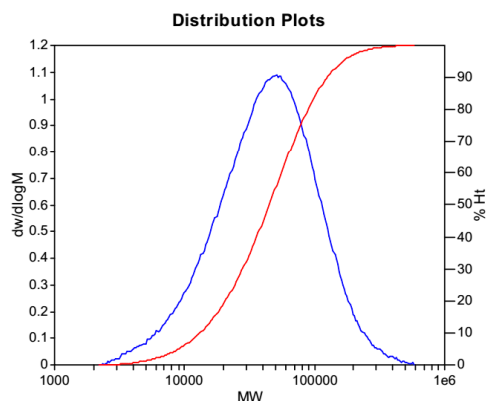**Figure S37.** GPC trace of the polymer from table 1, entry 15.**MW Averages**

Mp: 76612

Mn: 56023

Mv: 87900

Mw: 94208

Mz: 151068

Mz+1: 221259

PD: 1.6816

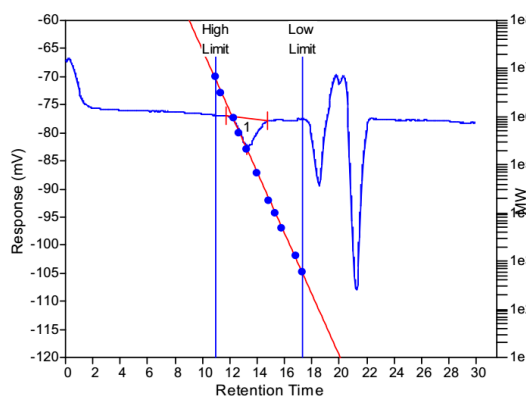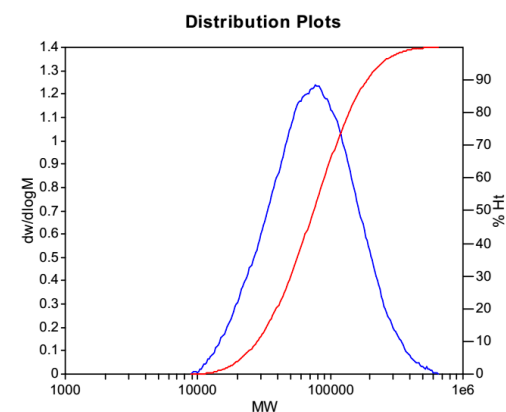**Figure S38.** GPC trace of the polymer from table 1, entry 16.**MW Averages**

Mp: 22549

Mn: 14063

Mv: 25370

Mw: 27508

Mz: 45396

Mz+1: 62619

PD: 1.9561

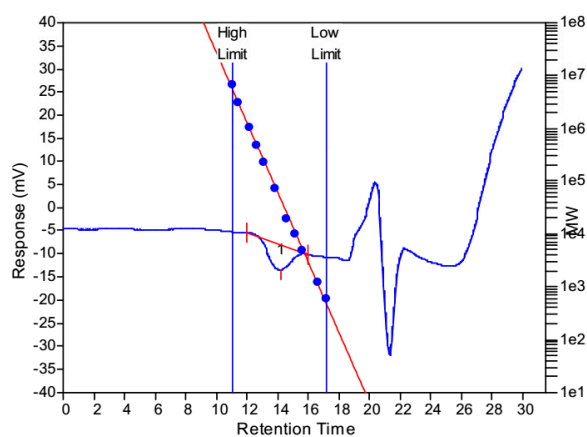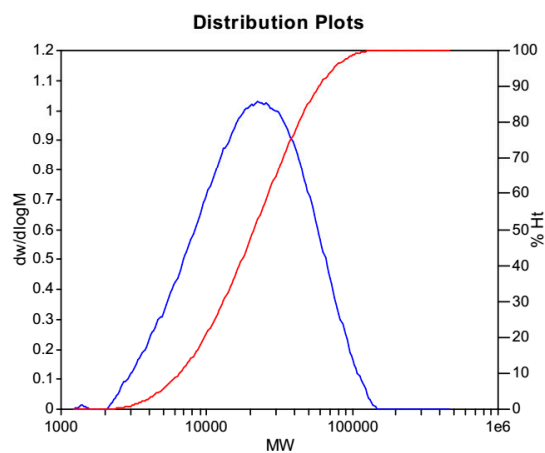**Figure S39.** GPC trace of the polymer from table 1, entry 17.

## 5. DSC figures of copolymers

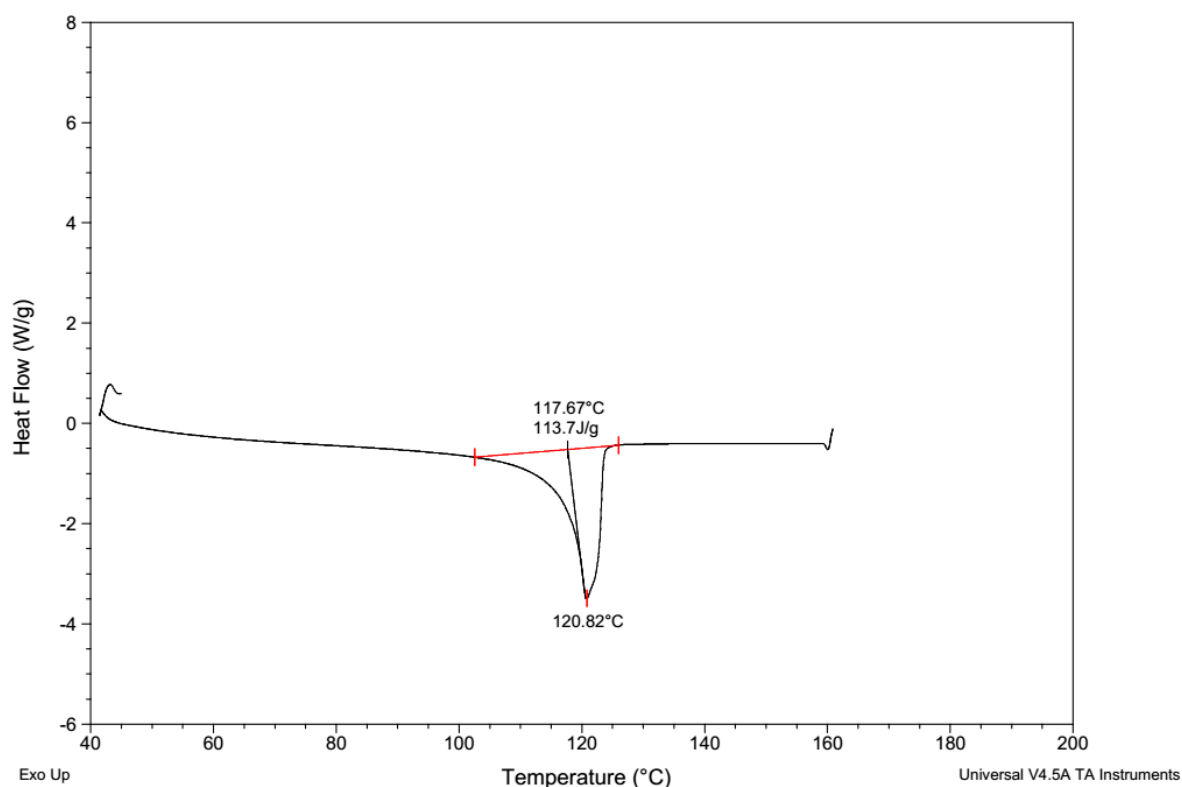

**Figure S40.** DSC data of the polymer from table 1, entry 2.

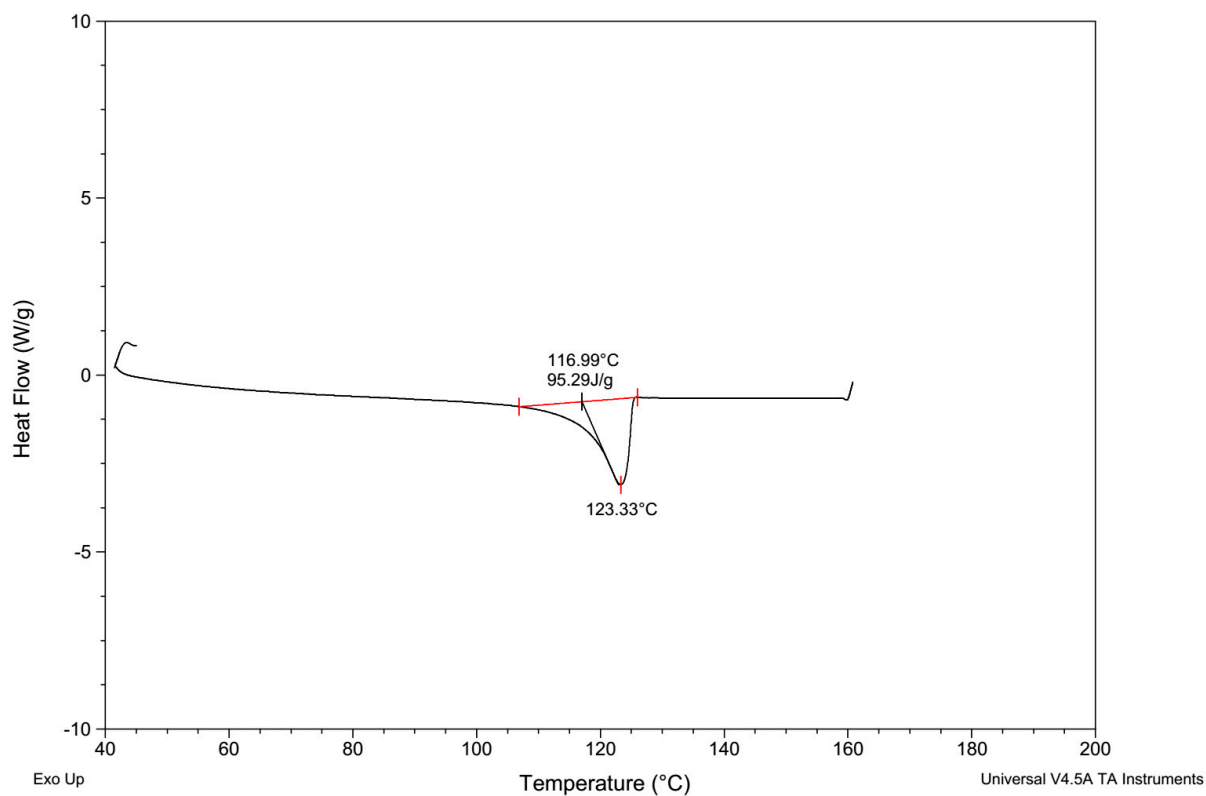

**Figure S41.** DSC data of the polymer from table 1, entry 6.

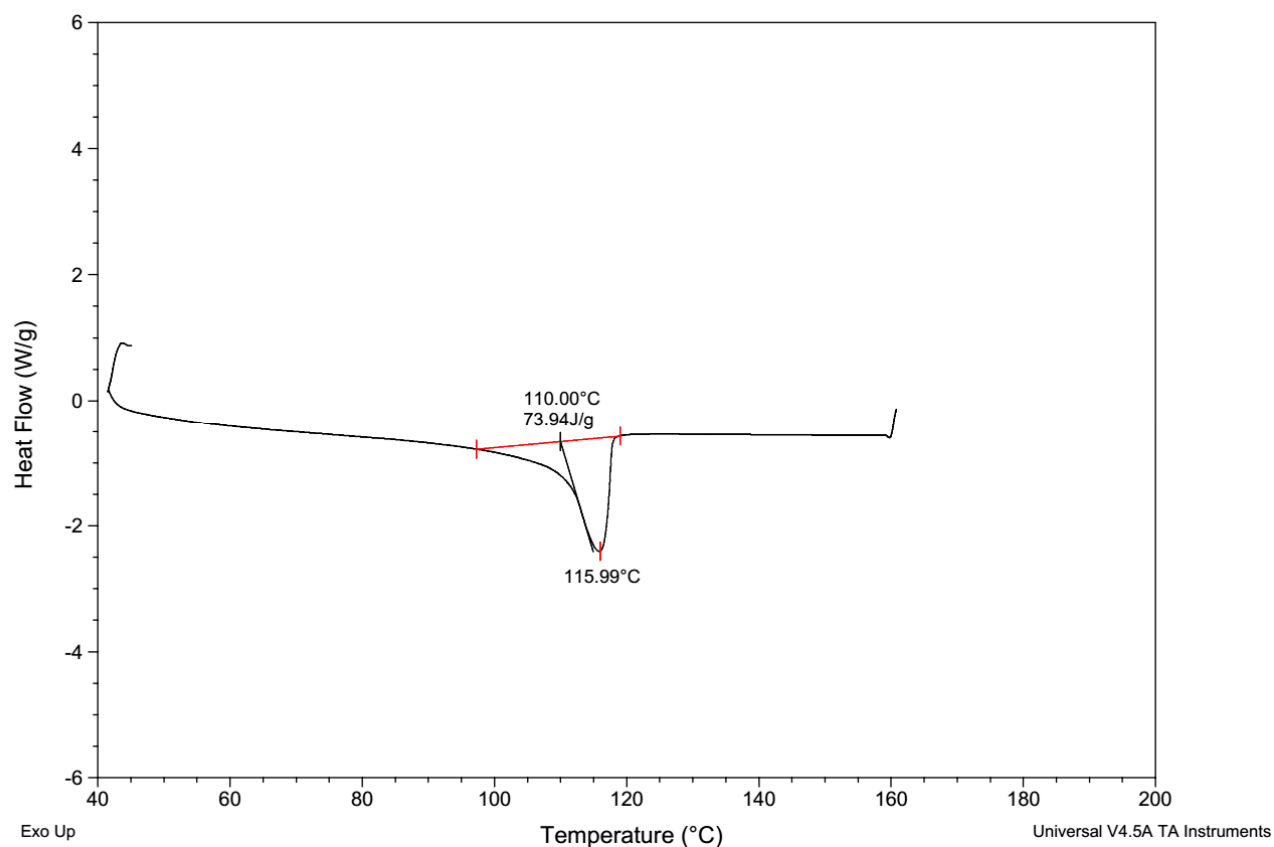

**Figure S42.** DSC data of the polymer from table 1, entry 7.

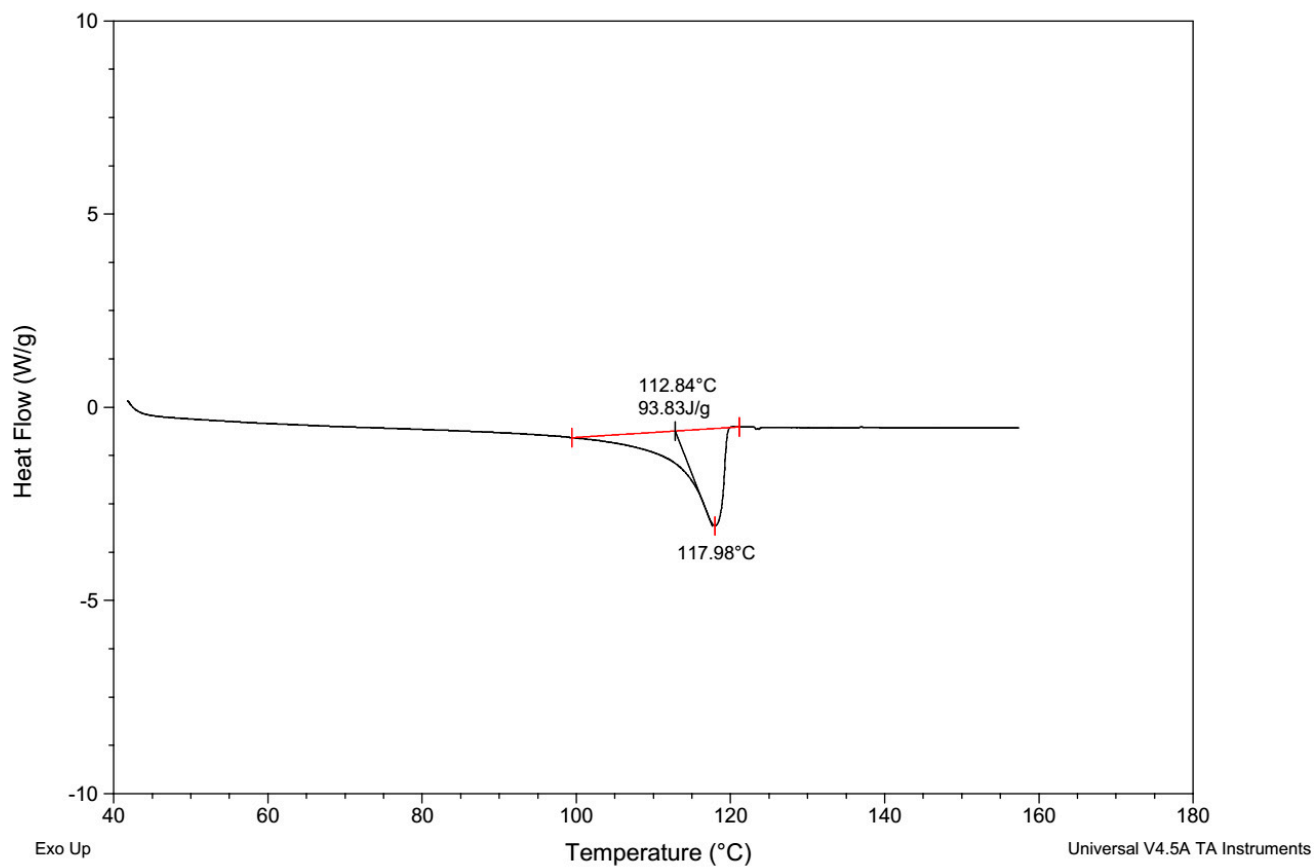

**Figure S43.** DSC data of the polymer from table 1, entry 12.

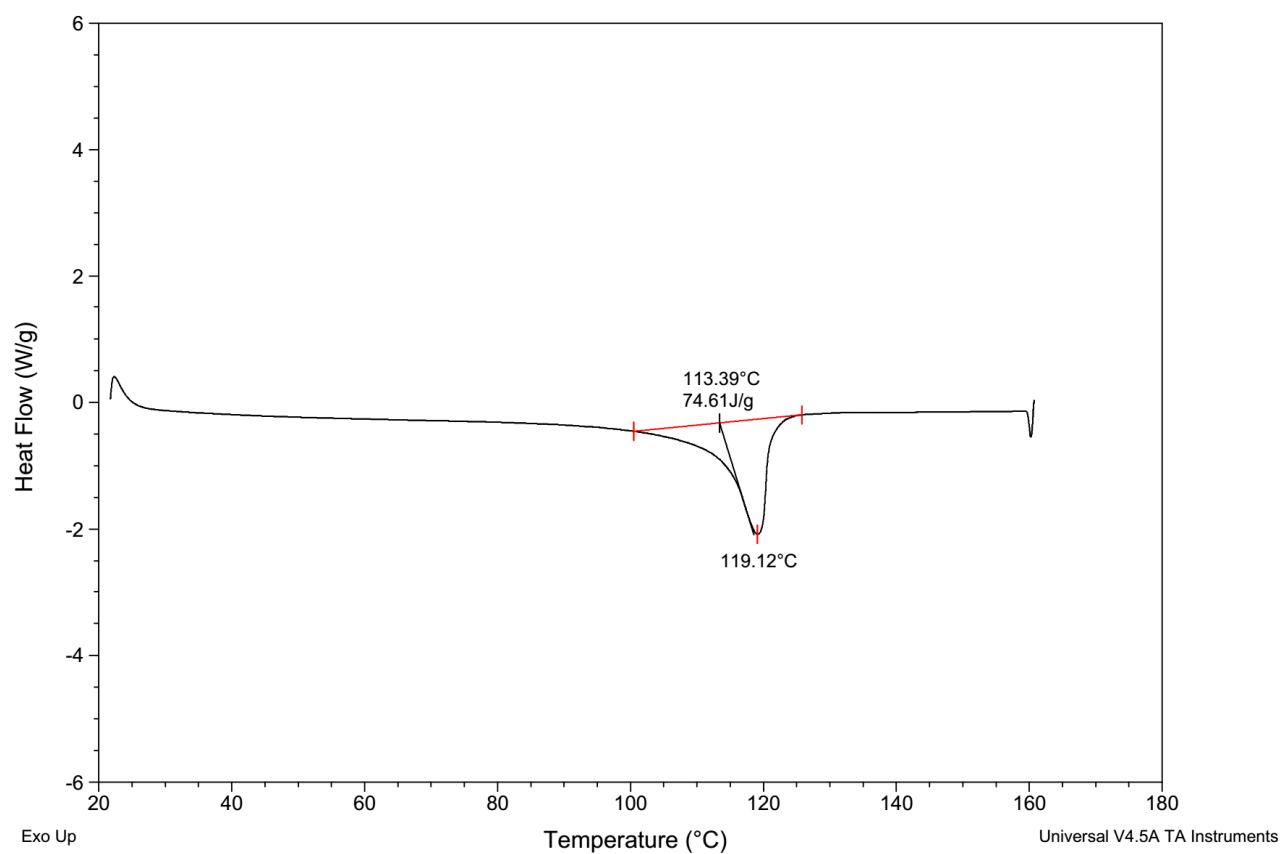

**Figure S44.** DSC data of the polymer from table 1, entry 14.

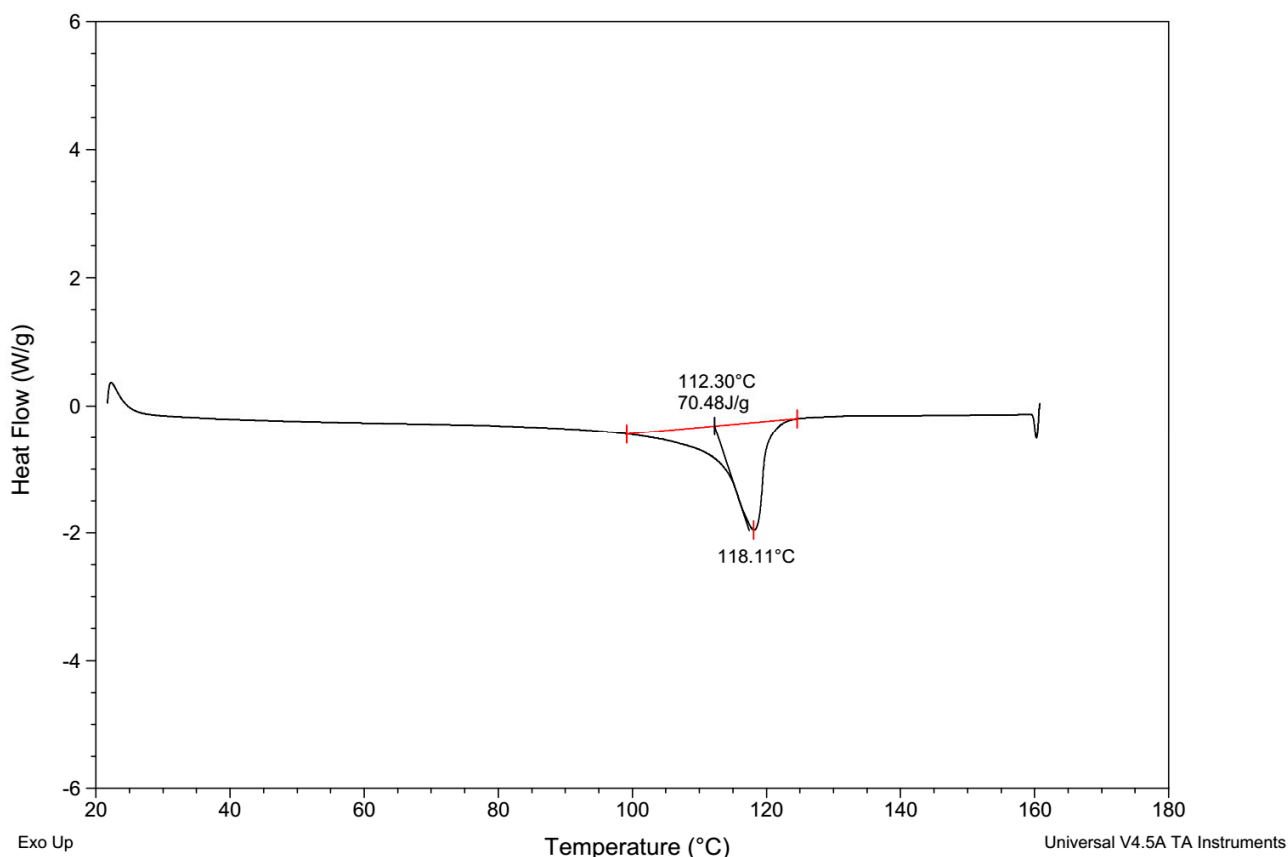

**Figure S45.** DSC data of the polymer from table 1, entry 15.

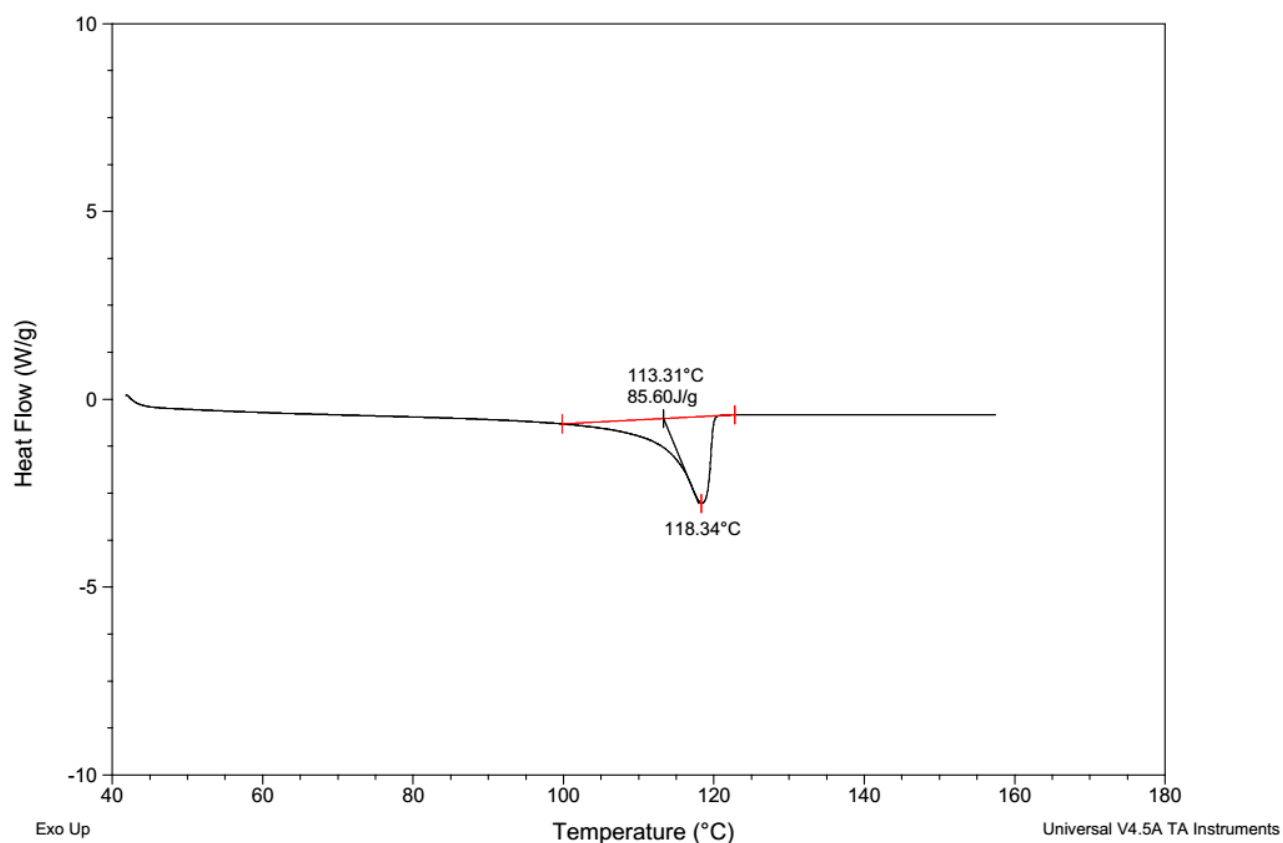

**Figure S46.** DSC data of the polymer from table 1, entry 16.

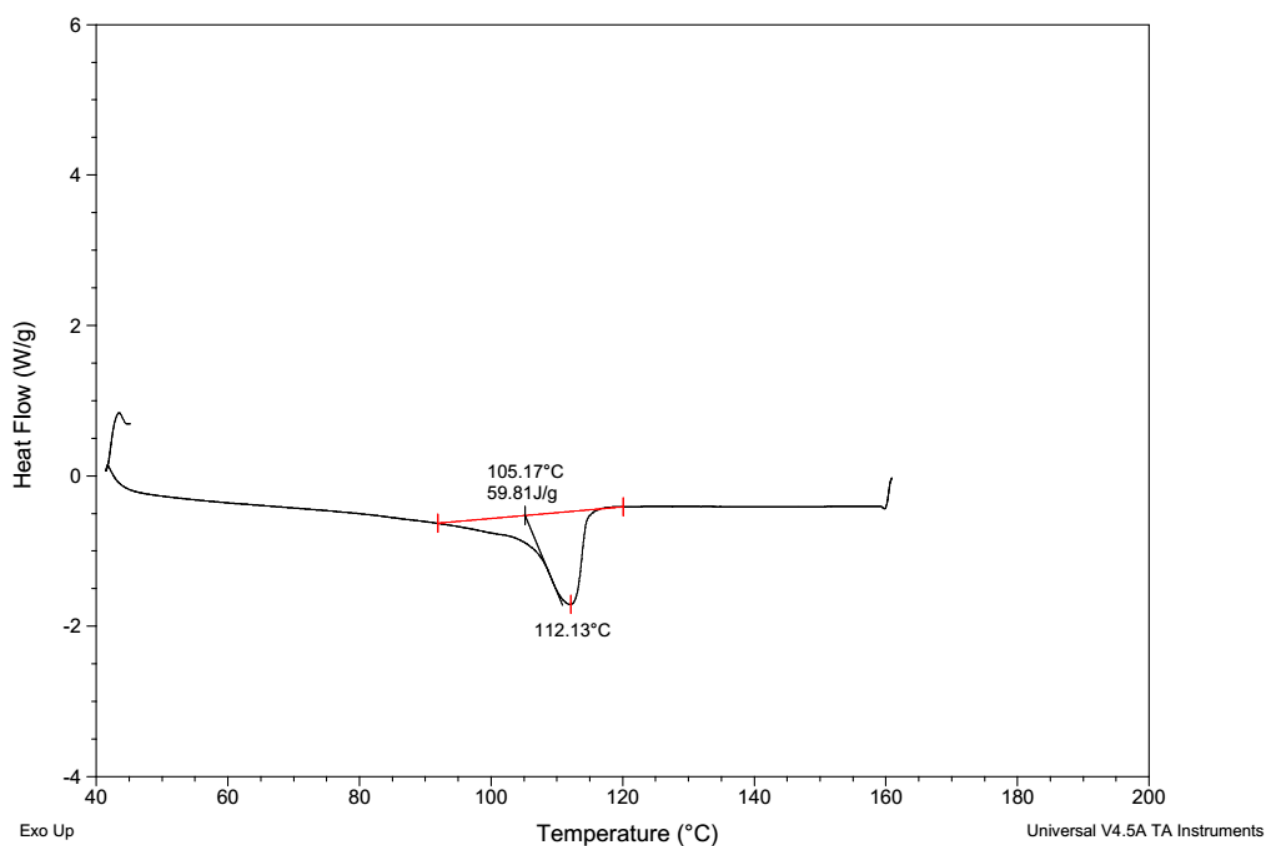

**Figure S47.** DSC data of the polymer from table 1, entry 17.

## 6. Steric maps of Pd-1, Pd-2 and Pd-3

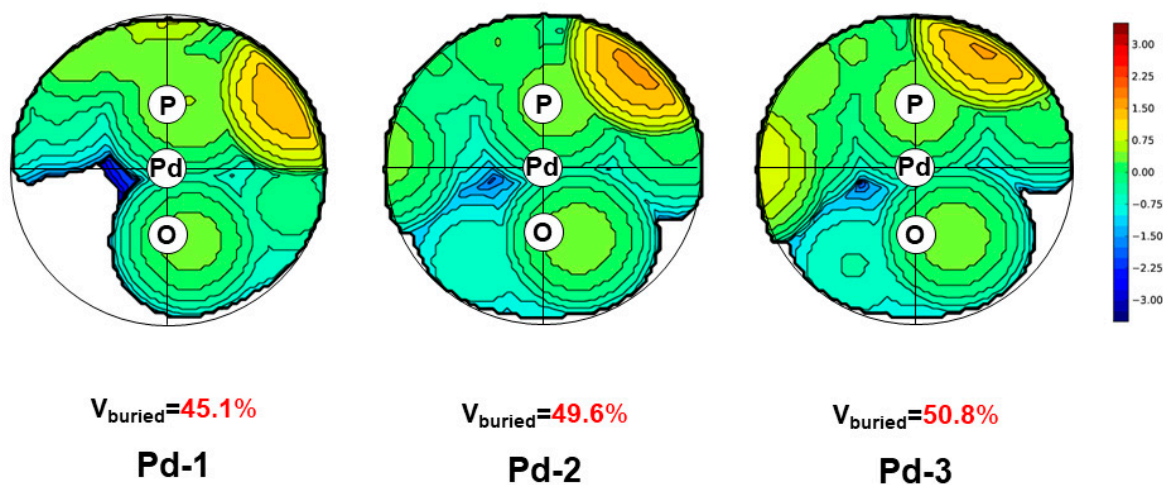

Figure S48. Steric maps of Pd-1, Pd-2 and Pd-3.

## 7. Possible reaction pathways in the copolymerization process

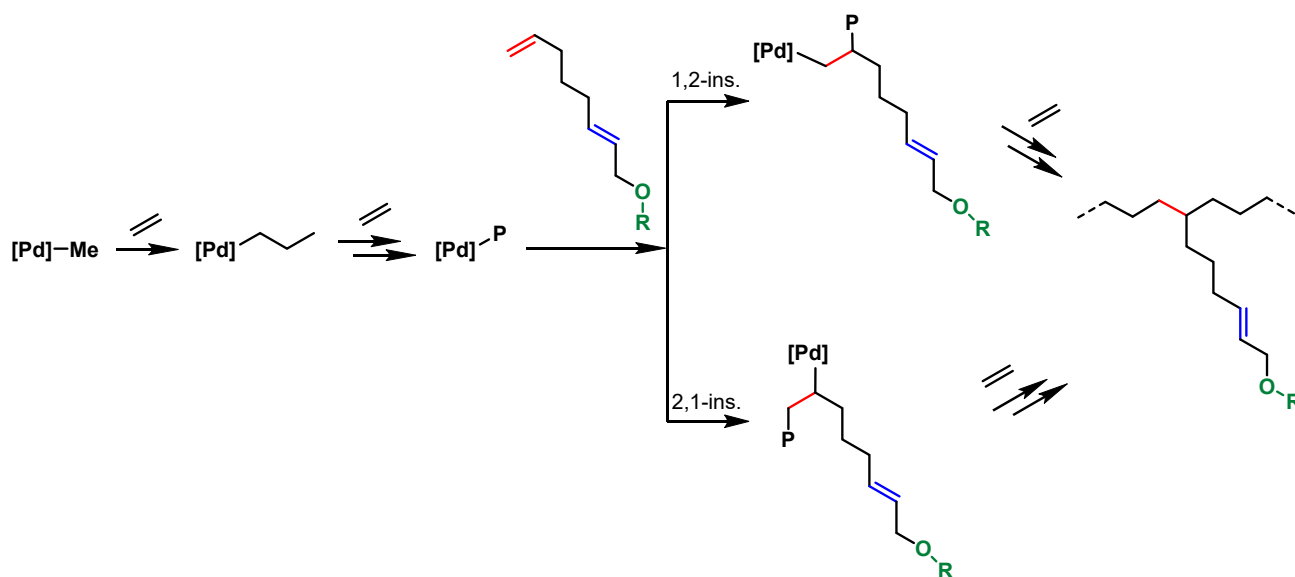

Figure S49. Possible reaction pathways in the copolymerization process.
